# Supplementary material for: Requirements for a global data infrastructure in support of CMIP6
Source: Copernicus journal article supplement (doi:10.5194/gmd-2018-52), 2018-03-22
Supplement: Supplementary file [file gmd-2018-52-AC5-supplement.pdf]

# Requirements for a global data infrastructure in support of CMIP6

Venkatramani Balaji<sup>1,2</sup>, Karl Everyman Taylor<sup>3</sup>, Martin Juckes<sup>4</sup>, Bryan N. Lawrence<sup>5,4</sup>, Michael Lautenschlager<sup>6</sup>, Chris Blanton<sup>7,2</sup>, Luca Cinquini<sup>8</sup>, Sébastien Denvil<sup>9</sup>, Paul J. Durack<sup>3</sup>, Mark Elkington<sup>10</sup>, Francesca Guglielmo<sup>9</sup>, Eric Guilyardi<sup>9,4</sup>, David Hassell<sup>4</sup>, Slava Kharin<sup>11</sup>, Stefan Kindermann<sup>6</sup>, Sergey Nikonov<sup>1,2</sup>, Aparna Radhakrishnan<sup>7,2</sup>, Martina Stockhause<sup>6</sup>, Tobias Weigel<sup>6</sup>, and Dean Williams<sup>3</sup>

<sup>1</sup>Princeton University, Cooperative Institute of Climate Science, Princeton NJ, USA

<sup>2</sup>NOAA/Geophysical Fluid Dynamics Laboratory, Princeton NJ, USA

<sup>3</sup>PCMDI, Lawrence Livermore National Laboratory, Livermore, CA, USA

<sup>4</sup>Science and Technology Facilities Council, Abingdon, UK

<sup>5</sup>National Center for Atmospheric Science and University of Reading, UK

<sup>6</sup>Deutsches KlimaRechenZentrum GmbH, Hamburg, Germany

<sup>7</sup>Engility Inc., NJ, USA

<sup>8</sup>Jet Propulsion Laboratory (JPL), 4800 Oak Grove Drive, Pasadena, CA 91109, USA

<sup>9</sup>Institut Pierre-Simon Laplace, CNRS/UPMC, Paris, France

<sup>10</sup>Met Office, FitzRoy Road, Exeter, EX1 3PB, UK

<sup>11</sup>Canadian Centre for Climate Modelling and Analysis, Atmospheric Environment Service, University of Victoria, BC, Canada

*Correspondence to:* V. Balaji (balaji@princeton.edu)

**Abstract.** The World Climate Research Programme (WCRP)'s Working Group on Climate Modeling (WGCM) Infrastructure Panel (WIP) was formed in 2014 in response to the explosive growth in size and complexity of Coupled Model Intercomparison Projects (CMIPs) between CMIP3 (2005-06) and CMIP5 (2011-12). This article presents the WIP recommendations for the global data infrastructure needed to support CMIP design, future growth and evolution. Developed in close coordination with those who build and run the existing infrastructure (the Earth System Grid Federation), the recommendations are based on several principles beginning with the need to separate requirements, implementation, and operations. Other important principles include the consideration of the diversity of community needs around data – a *data ecosystem* – the importance of provenance, the need for automation, and the obligation to measure costs and benefits.

This paper concentrates on requirements, recognising the diversity of communities involved (modelers, analysts, software developers, and downstream users). Such requirements include the need for scientific reproducibility and accountability alongside the need to record and track data usage. One key element is to generate a dataset-centric rather than system-centric focus, with an aim to making the infrastructure less prone to systemic failure.

With these overarching principles and requirements, the WIP has produced a set of position papers, which are summarized here. They provide specifications for managing and delivering model output, including strategies for replication and versioning, licensing, data quality assurance, citation, long-term archival, and dataset tracking. They also describe a new and more formal approach for specifying what data, and associated metadata, should be saved, which enables future data volumes to be estimated.

The paper concludes with a future-facing consideration of the global data infrastructure evolution that follows from the blurring of boundaries between climate and weather, and the changing nature of published scientific results in the digital age.

## 1 Introduction

CMIP6 (Eyring et al., 2016a), the latest Coupled Model Intercomparison Project (CMIP), can trace its genealogy back to the Charney Report (Charney et al., 1979). This seminal report on the links between CO<sub>2</sub> and climate was an authoritative summary of the state of the science at the time, and produced findings that have stood the test of time (Bony et al., 2013). It is often noted (see, e.g Andrews et al., 2012) that the range and uncertainty bounds on equilibrium climate sensitivity generated in this report have not fundamentally changed, despite the enormous increase in resources devoted to analysing the problem in decades since.

Beyond its enduring findings on climate sensitivity, the Charney Report also gave rise to a methodology for the treatment of uncertainties and gaps in understanding, which has been equally influential, and is in fact the basis of CMIP itself. The Report can be seen as one of the first uses of the *multi-model ensemble*. At the time, there were two models available representing the equilibrium response of the climate system to a change in CO<sub>2</sub> forcing, one from Syukuro Manabe’s group at NOAA’s Geophysical Fluid Dynamics Laboratory, and the other from James Hansen’s group at NASA’s Goddard Institute for Space Studies. Then as now, these groups marshaled vast state-of-the-art computing and data resources to run very challenging simulations of the Earth system. The Report’s results were based on an ensemble of three runs from the Manabe group, labeled M1-M3, and two from the Hansen group, labeled H1-H2.

The Atmospheric Model Intercomparison Project (AMIP: Gates, 1992) was one of the first systematic cross-model comparisons open to anyone who wished to participate. By the time of the Inter-Governmental Panel on Climate Change (IPCC)’s First Assessment Report (FAR) in 1990 (Houghton et al., 1992), the process had been formalized. At this stage, there were five models participating in the exercise, and some of what is now called the “Diagnosis, Evaluation, and Characterization of Klima” (DECK, see Eyring et al., 2016a) experiments<sup>1</sup> had been standardized (AMIP, a pre-industrial control, 1% per year CO<sub>2</sub> increase to doubling, etc). The “scenarios” had emerged as well, for a total of five different experimental protocols. Fast-forwarding to today, CMIP6 expects more than 75 models from around 35 modeling centers (in 14 countries, a stark contrast to the US monopoly in Charney et al., 1979) to participate in the DECK and historical experiments (Table 2 of Eyring et al., 2016a), and some subset of these to participate in one or more the 21 MIPs endorsed by the CMIP Panel (Table 3 of Eyring et al., 2016a, , now 23 with two new endorsed MIPs since). The MIPs call for over 200 experiments, a considerable expansion over CMIP5.

Alongside the experiments themselves is the data request which defines, for each CMIP experiment, what output each model should provide for analysis. The complexity of this data request has also grown tremendously over the CMIP era. A typical dataset from the FAR archive (from the GFDL R15 model<sup>2</sup>) lists climatologies and time series of two variables, and the dataset

---

<sup>1</sup>“Klima” is German for “climate”.

<sup>2</sup><https://goo.gl/M1WSJy>, retrieved July 26, 2018.

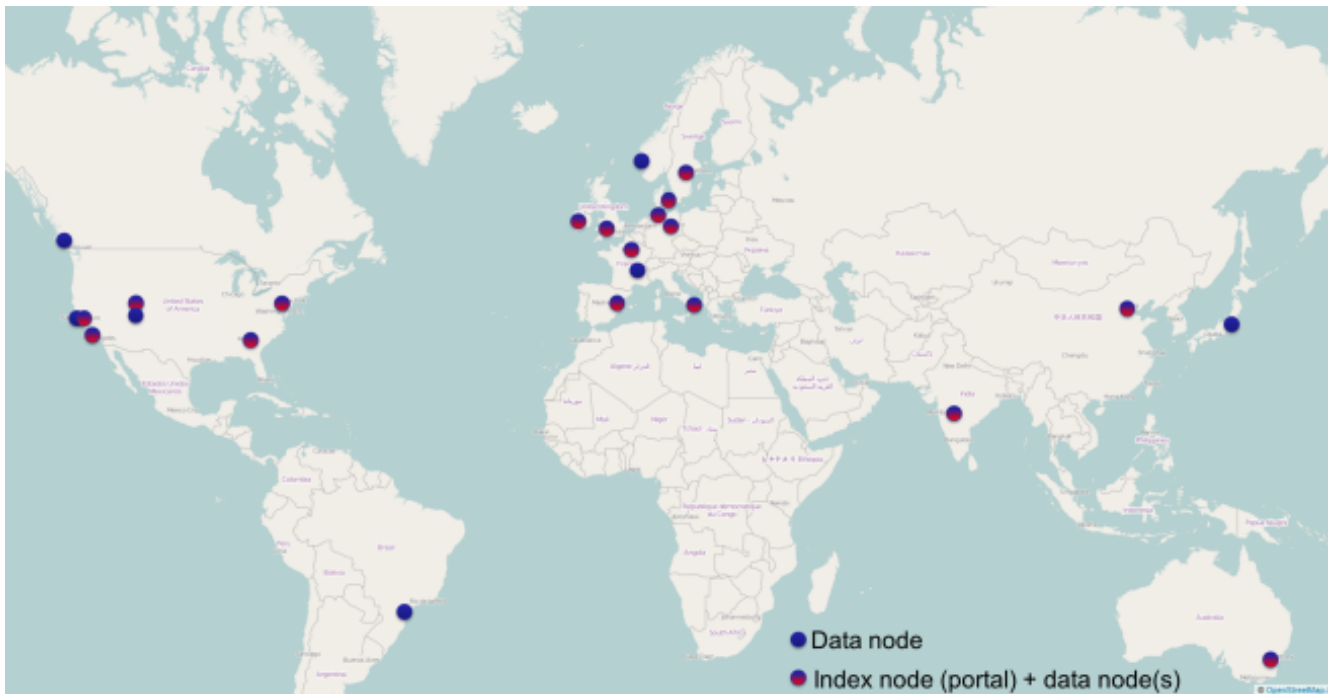

**Figure 1.** Sites participating in the Earth System Grid Federation in May 2017. Figure courtesy IS-ENES Data Portal.

size is about 200 MB. The CMIP6 Data Request [Jukes et al. \(2015\)](#) lists literally thousands of variables from the hundreds of experiments mentioned above. This growth in complexity is testament to the modern understanding of many physical, chemical and biological processes which were simply absent from the Charney Report era models.

The simulation output is now a primary scientific resource for researchers the world over, rivaling the volume of observed weather and climate data from the global array of sensors and satellites ([Overpeck et al., 2011](#)). Climate science, and observed and simulated climate data in particular, have now become primary elements in the “vast machine” ([Edwards, 2010](#)) serving the global climate and weather enterprise.

Managing and sharing this huge amount of data is an enterprise in its own right – and the solution established for CMIP5 was the global Earth System Grid Federation (ESGF, [Williams et al., 2011, 2015](#)). ESGF was identified by the WCRP Joint Scientific Committee in 2013 as the recommended infrastructure for data archiving and dissemination for the Programme. A map of sites participating in the ESGF are shown in [Figure 1](#) drawn from [IS-ENES Data Portal](#)<sup>3</sup>. The sites are diverse and responsive to many national and institutional missions. With multiple agencies and institutions, and many uncoordinated and possibly conflicting requirements, the ESGF itself is a complex and delicate artifact to manage.

The sheer size and complexity of this infrastructure emerged as a matter of great concern at the end of CMIP5, when the growth in data volume relative to CMIP3 (from 40 TB to 2 PB, a 50-fold increase in 6 years) suggested the community was on

<sup>3</sup><https://portal.enes.org/data/is-enes-data-infrastructure/esgf>, retrieved July 26, 2018.

an unsustainable path. These concerns led to the 2014 recommendation of the WGCM to form an *infrastructure panel* (based upon a [proposal](#)<sup>4</sup> at the 2013 annual meeting). The WGCM Infrastructure Panel (WIP) was tasked with examining the global computational and data infrastructure underpinning CMIP, and improving communication between the teams overseeing the scientific and experimental design of these globally coordinated experiments, and the teams providing resources and designing that infrastructure. The communication was intended to be two-way: providing input both to the provisioning of infrastructure appropriate to the experimental design, and informing the scientific design of the technical (and financial) limits of that infrastructure.

This paper provides a summary of the findings by the WIP in the first three years of activity since its formation in 2014, and the consequent recommendations – in the context of existing organisational and funding constraints. In the text below, we refer to *findings*, *requirements*, and *recommendations*. Findings refer to observations about the state of affairs: technologies, resource constraints, and the like, based upon our analysis. Requirements are design goals that have been shared with those building the infrastructure, such as the ESGF software stack. Recommendations are our guidance to the community: experiment designers, modeling centres, and the users of climate data.

The intended audience for the paper is primarily the scientific community around CMIP6. In particular, we aim to show how the scientific design of CMIP6 as outlined in [Eyring et al. \(2016a\)](#) translates into infrastructural requirements. We hope this will be instructive to creators of multi-model experiments as to the resource implications of their experimental design, and for data providers (modeling centres), explain the sometimes opaque requirements imposed upon them as a requisite for participation. We believe an explanation may also be useful who find data acquisition and analysis a technical challenge, to understand the design of infrastructure in a resource-constrained environment. Finally, we hope this will be of interest to general readers of the journal from other geoscience fields, illuminating the particular character of global data infrastructure for climate data, where the community of users far outstrip in numbers and diversity, the Earth system modeling community itself.

In Section 2, the principles and scientific rationale underlying the requirements for global data infrastructure are articulated. In Section 3 the CMIP6 Data Request is covered: standards and conventions, requirements for modeling centers to process a complex data request, and projections of data volume. In Section 4, recent evolution in how data are archived is reviewed alongside a licensing strategy consistent with current practice and scientific principle. In Section 5 issues surrounding data as a citable resource are discussed, including the technical infrastructure for the creation of citable data, and the documentation and other standards required to make data a first-class scientific entity. In Section 6 the implications of data replicas and in Section 7 issues surrounding data versioning, retraction, and errata are addressed. Section 8 provides an outlook for the future of global data infrastructure, looking beyond CMIP6 towards a unified view of the “vast machine” for weather and climate computation and data.

---

<sup>4</sup><https://goo.gl/FHqbNN>, retrieved July 26, 2018.

## 2 Principles and Constraints

This section lays out some of the the principles and constraints which have resulted from the evolution of infrastructure requirements since the first CMIP experiment – beginning with the historical context.

### 2.1 Historical Context

5 In the pioneering days of CMIP, the community of participants was small and well-knit, and all the issues involved in generating datasets for common analysis from different modeling groups could be settled by mutual agreement (Ron Stouffer, personal communication). Analysis was performed by the same community that performed the simulations. The Program for Climate Model Diagnostics and Intercomparison (PCMDI), established in 1989, had championed the idea of more systematic analysis of models, and in close cooperation with the climate modeling centers, PCMDI assumed responsibility for much of the day-to-  
10 day coordination of CMIP. Until CMIP3, the hosting of datasets from different modeling groups could be managed at a single archival site; PCMDI alone hosted the entire 40 TB archive.

From its earliest phases, CMIP grew in importance, and its results provided a major pillar supporting the periodic Inter-governmental Panel on Climate Change (IPCC) assessment activity. However, the explosive growth in the scope of CMIP, especially between CMIP3 and CMIP5, represented a tipping point in the supporting infrastructure. Not only was it clear that  
15 no one site could manage all the data, the necessary infrastructure software and operational principles could no longer be delivered and managed by PCMDI alone.

For CMIP5, PCMDI sought help from a number of partners under the auspices of the Global Organisation of Earth System Science Portals (GO-ESSP). In the main, the GO-ESSP partners who became the foundation members and developers of the Earth System Grid Federation retargeted existing research funding to develop ESGF. The primary heritage was the original  
20 U.S. Earth System Grid Federation project, but major components came from new international partners. This meant that many aspects of the ESGF system began from work which was designed in the context of different requirements, collaborations, and objectives. At the beginning, none of the partners had funds for operational support for the fledgling international federation, and even after the end of CMIP5 proper, the ongoing ESGF has been sustained primarily by small amounts of funding at a handful of the ESGF sites. Most ESGF sites have had little or no formal operational support. Many of the known limitations of  
25 the CMIP5 ESGF – both in terms of functionality and performance – were a direct consequence of this heritage.

With the advent of CMIP6, it was clear that a fundamental reassessment would be needed to address the evolving scientific and operational requirements. That clarity led to the establishment of the WIP, but it has yet to lead to any formal joint funding arrangement – the ESGF and the data nodes within it remain funded (if at all, many data nodes are marginal activities supported on best efforts) by national agencies with disparate timescales and objectives. Several critical software elements also are being  
30 developed on volunteer efforts and shoestring budgets. This finding has been noted in the US National Academies Report on “A National Strategy for Advancing Climate Modeling” (NASEM, 2012), which warned of the consequences of inadequate infrastructure funding.

## 2.2 Infrastructural Principles

1. With greater complexity and a globally distributed data resource, it has become clear that in the design of globally coordinated scientific experiments, the global computational and data infrastructure needs to be formally examined as an integrated element.

5 The membership of the WIP, drawn as it is from experts in various aspects of the infrastructure, is a direct consequence of this requirement for integration. Representatives of modeling centers, infrastructure developers, and stakeholders in the scientific design of CMIP and its output comprise the panel membership. One of the WIP's first acts was to consider three phases in the process of infrastructure development: *requirements*, *implementation*, and *operations*, all informed by the builders of workflows at the modeling centers.

- 10 – The WIP, in consort with the CMIP Panel, takes responsibility to articulate *requirements* for the infrastructure.
- The *implementation* is in the hands of the infrastructure developers, principally ESGF for the federated archive (Williams et al., 2015), but also related projects like Earth System Documentation (ES-DOC<sup>5</sup>, Guilyardi et al., 2013).
- In 2016 at the WIP's request, the CMIP6 Data Node *Operations* Team (CDNOT) was formed. It is charged
- 15 with ensuring that all the infrastructure elements needed by CMIP6 are properly deployed and actually working as intended at the sites hosting CMIP6 data. It is also responsible for the operational aspects of the federation itself, including specifying what versions of the toolchain are run at every site at any given time, and organizing coordinated version upgrades across the federation.

Although there is now a clear separation of concerns into requirements, implementation, and operations, close links are

20 maintained by cross-membership between the key bodies, including the WIP itself, the CMIP Panel, the ESGF Executive Committee, and the CDNOT.

2. With the basic fact of anthropogenic climate change now well established (see, e.g., Stocker et al., 2013) the scientific communities with an interest in CMIP is expanding. For example, a substantial body of work has begun to emerge to examine climate impacts. In addition to the specialists in Earth system science – who also design and run the experiments

25 and produce the model output – those relying on CMIP output now include those developing and providing climate services, as well as *consumers* from allied fields studying the impacts of climate change on health, agriculture, natural resources, human migration, and similar issues (Moss et al., 2010). This confronts us with a *scientific scalability* issue (the data during its lifetime will be consumed by a community much larger, both in sheer numbers, and also in breadth of interest and perspective than the Earth system modeling community itself), which needs to be addressed.

30 Accordingly, we note the requirement that infrastructure should ensure maximum transparency and usability for user (consumer) communities at some distance from the modeling (producer) communities.

---

<sup>5</sup><https://goo.gl/WNwKD9>, retrieved July 26, 2018.

3. While CMIP and the IPCC are formally independent, the CMIP archive is increasingly a reference in formulating climate policy. Hence the *scientific reproducibility* (Collins and Tabak, 2014) and the underlying *durability* and *provenance* of data have now become matters of central importance: being able to trace back, long after the fact, from model output to the configuration of models, and procedures and choices made along the way. This led the IPCC to require data distribution centers (DDCs) to attempt to guarantee the archival and dissemination of this data in perpetuity, and consequently to a requirement in the CMIP context of achieving reproducibility. Given the use of multi-model ensembles for both consensus estimates and uncertainty bounds on climate projections, it is important to document – as precisely as possible, given the independent genealogy and structure of many models – the details and differences among model configurations and analysis methods, to deliver both the requisite provenance and the routes to reproduction.

4. With the expectation that CMIP DECK experiment results should be routinely contributed to CMIP, opportunities now exist for engaging in a more systematic and routine evaluation of Earth System Models (ESMs). This has led to community efforts to develop standard metrics of model “quality” (Eyring et al., 2016b; Gleckler et al., 2016). Typical multi-model analysis has hitherto taken the multi-model average, assigning equal weight to each model, as the most likely estimate of climate response. This “model democracy” (Knutti, 2010) has been called into question and there is now a considerable literature exploring the potential of weighting models by quality (Knutti et al., 2017). The development of standard metrics would aid this kind of research.

To that end, there is now a requirement to enable through the ESGF a framework for accommodating quasi-operational evaluation tools that could routinely execute a series of standardized evaluation tasks. This would provide data consumers with an increasingly (over time) systematic characterization of models. It may be some time before a fully operational system of this kind can be implemented, but planning must start now.

In addition, there is an increased interest in climate analytics as a service (Balaji et al., 2011; Schnase et al., 2017). This follows the principle of placing analysis close to the data. Some centres plan to add resources that combine archival and analysis capabilities, e.g., NCAR’s CMIP Analysis Platform<sup>6</sup>, or the UK’s JASMIN (Lawrence et al., 2013).. There are also new efforts to bring climate data storage and analysis to the cloud era (e.g Duffy et al., 2015). Platforms such as Pangeo<sup>7</sup> show much promise in this realm, and widespread experimentation and adoption is encouraged.

5. As the experimental design of CMIP has grown in complexity, costs both in time and money have become a matter of great concern, particularly for those designing, carrying out, and storing simulations. In order to justify commitment of resources to CMIP, mechanisms to identify costs and benefits in developing new models, performing CMIP simulations, and disseminating the model output need to be developed.

To quantify the scientific impact of CMIP, measures are needed to *track* the use of model output and its value to consumers. In addition to usage quantification, credit and tracing data usage in literature via citation of data is important. Current practice is at best citing large data collections provided by a CMIP participant, or all of CMIP. Accordingly, we

---

<sup>6</sup><https://goo.gl/sYTxC2>, retrieved July 26, 2018.

<sup>7</sup><http://pangeo-data.org/>, retrieved July 26, 2018.

note the need for a mechanism to identify and *cite* data provided by each modeling center. Alongside the intellectual contribution to model development, which can be recognized by citation, there is a material cost to centers in computing and data processing, which is both burdensome and poorly understood by those requesting, designing and using the results from

5 CMIP experiments, who might not be in the business of model development. The criteria for endorsement introduced in CMIP6 (see Table 1 in [Eyring et al., 2016a](#)) begins to grapple with this issue, but the costs still need to be measured and recorded. To begin documenting these costs for CMIP6, the “Computational Performance” MIP project (CPMIP) ([Balaji et al., 2017](#)) has been established, which will measure, among other things, throughput (simulated years per day) and cost (core-hours and joules per simulated year) as a function of model resolution and complexity. Tools for estimating data volumes have also developed, see Section 3.1 below.

6. Experimental specifications have become ever more complex, making it difficult to verify that experiment configurations conform to those specifications. Several modeling centers have encountered this problem in preparing for CMIP6, noting, for example, the challenging intricacies in dealing with input forcing data (see [Durack et al., 2018](#)), output variable lists ([Juckes et al., 2015](#)), and crossover requirements between the endorsed MIPs and the DECK ([Eyring et al., 2016a](#)). Moreover, these protocols inevitably evolve over time, as errors are discovered or enhancements proposed, and centers needed to be adaptable in their workflows accordingly.

We note therefore a requirement to encode the protocols to be directly ingested by workflows, in other words, *machine-readable experiment design*. The intent is to avoid, as far as possible, errors in conformance to design requirements introduced by the need for humans to transcribe and implement the protocols, for instance, deciding what variables to save from what experiments. This is accomplished by encoding most of the specifications in structured text formats which can be directly read by the scripts running the model and post-processing, as explained further below in Section 3. The requirement spans all of the *controlled vocabularies* (CVs: for instance the names assigned to models, experiments, and output variables) used in the CMIP protocols as well as the CMIP6 Data Request ([Juckes et al., 2015](#)), which must be stored in version-controlled, machine-readable formats. Precisely documenting the *conformance* of experiments to the protocols ([Lawrence et al., 2012](#)) is an additional requirement.

7. The transition from a unitary archive at PCMDI in CMIP3 to a globally federated archive in CMIP5 led to many changes in the way users interact with the archive, which impacts management of information about users and complicates communications with them. In particular, a growing number of data users no longer register or interact directly with the ESGF. Rather they rely on secondary repositories, often “snapshots” of the state of some portion of the ESGF archive created by others at a particular time (see for instance the [IPCC CMIP5 Data Factsheet](#)<sup>8</sup> for a discussion of the snapshots and their coverage). This meant that reliance on the ESGF’s inventory of registered users for any aspect of the infrastructure – such as tracking usage, compliance with licensing requirements, or informing users about errata or retractions – could at best ensure partial coverage of the user base.

---

<sup>8</sup><https://goo.gl/34AtW6>, retrieved July 26, 2018.



This key finding implies a more distributed design for several features outlined below, which devolve many of these features to the datasets themselves rather than the archives. One may think of this as a *dataset-centric rather than system-centric* design (in software terms, a *pull* rather than *push* design): information is made available upon request at the user/dataset level, relieving the ESGF implementation of an impossible burden.

- 5 Based upon these considerations, the WIP produced a set of position papers (see Appendix A) encapsulating specifications and recommendations for CMIP6 and beyond. These papers, summarized below, are available from the [WIP website](#)<sup>9</sup>. As the WIP continues to develop additional recommendations, they too will be made available. As requirements evolve, a modified document will be released with a new version number.

### 3 A structured approach to data production

- 10 The CMIP6 data framework has evolved considerably from CMIP5, and follows the principles of scientific reproducibility (Item 3 in Section 2), and the recognition that the complexity of the experimental design (Item 6) required far greater degrees of automation and embedding in workflows. This requires that all elements in the specification be recorded in structured text formats (XML and JSON, for example), and subject to rigorous version control. *Machine-readable* specification of as many aspects of the model output configuration as possible is a design goal, as noted earlier.
- 15 The data request spans several elements discussed in sub-sections below.

#### 3.1 CMIP6 Data Request

- The CMIP6 Data Request is one of the most complex elements of the CMIP6 infrastructure. It is a direct response to the complexity of the new design outlined in [Eyring et al. \(2016a\)](#). The experimental design now involves 3 tiers of experiments, where an individual modeling group may choose which ones to perform; and variables grouped by scientific goals and priorities, where again centres may choose which sets to publish, based on interests and resource constraints. There are also cross-experiment data requests, where for instance the design may require a variable in one experiment to be compared against the same variable from a different experiment. The modeling groups will then need to take this into account before beginning their simulations. The CMIP6 Data Request is a codification of the entire experimental design into a structured set of machine-readable documents, which can in principle be directly ingested in data workflows.
- 20 where again centres may choose which sets to publish, based on interests and resource constraints. There are also cross-experiment data requests, where for instance the design may require a variable in one experiment to be compared against the same variable from a different experiment. The modeling groups will then need to take this into account before beginning their simulations. The CMIP6 Data Request is a codification of the entire experimental design into a structured set of machine-readable documents, which can in principle be directly ingested in data workflows.
- 25 The [CMIP6 Data Request](#)<sup>10</sup> ([Juckes et al., 2015](#)) combines definitions of variables and their output format with specifications of the objectives they support and the experiments that they are required for. The entire request is encoded in an XML database with rigorous type constraints. Important elements of the request, such as units, cell methods (expressing the subgrid processing implicit in the variable definition), and frequencies and time “slices” (subsets of the entire simulation period as defined in the experimental design) for required output, are defined as controlled vocabularies within the request to ensure consistency of

<sup>9</sup><https://www.earthsystemcog.org/projects/wip/>, retrieved July 26, 2018.

<sup>10</sup><https://goo.gl/iNBQ9m>, retrieved July 26, 2018.

usage. The request is designed to enable flexibility, allowing modeling centers to make informed decisions about the variables they should submit to the CMIP6 archive from each experiment.

In order to facilitate the cross linking between the 2100 variables from 248 experiments, the request database allows MIPs to aggregate variables and experiments into groups. This allows MIPs to designate variable groups by priority, and allow queries that return a *Request*, informing the modeling groups of the variables needed from any given experiment, at the specified time slices and frequencies.

This formulation takes into account the complexities that arise when a particular MIP requests that variables needed for their own experiments should also be saved from a DECK experiment or from an experiment proposed by a different MIP.

The data request supports a broad range of users who are provided with a range of different access points. These include the entire codification in the form of structured (XML) document, web pages, or spreadsheets, as well as a python API and command-line tools to satisfy a wide variety of usage patterns for accessing and using the data request.

The data request's machine-readable database has been an extraordinary resource for the modeling centers. They can, for example, directly integrate the request specifications with their workflows to ensure that the correct set of variables are saved for each experiment they plan to run. In addition, it has given them a new-found ability to estimate the data volume associated with meeting a MIP's requirements, a feature exploited below in Section 3.4.

## 3.2 Model inputs

Datasets used by the model for configuration of model inputs (`input4MIPs`, see Durack et al., 2018) as well as observations for comparison with models (`obs4MIPs`, see Teixeira et al., 2014; Ferraro et al., 2015) are both now organized in the same way, and share many of the naming and metadata conventions as the CMIP model output itself. The coherence of standards across model inputs, outputs, and observational datasets is a development that will enable the community to build a rich toolset across all of these datasets. The datasets follow versioning methodologies below in Section 7.

## 3.3 Data Reference Syntax

The organization of the model output follows the [Data Reference Syntax \(DRS\)](#)<sup>11</sup> first used in CMIP5, and now in somewhat modified form in CMIP6. The DRS depends on pre-defined *controlled vocabularies* (CVs) for various terms including: the names of institutions, models, experiments, time frequencies, etc. The CVs are now recorded as a version-controlled set of structured text documents, and satisfies the requirement that there is a [single authoritative source for any CV](#)<sup>12</sup>, on which all elements in the toolchain will rely. The DRS elements that rely on these controlled vocabularies appear as netCDF attributes and are used in constructing file names, directory names, and unique identifiers of datasets that are essential throughout the CMIP6 infrastructure. These aspects are covered in detail in the [CMIP6 Global Attributes, DRS, Filenames, Directory Structure, and CVs](#)<sup>13</sup> position paper. A new element in the DRS indicates whether data has been stored on a native grid or has been regridded

---

<sup>11</sup><http://goo.gl/v1drZl>, retrieved July 26, 2018.

<sup>12</sup><https://goo.gl/HGafnJ>, retrieved July 26, 2018.

<sup>13</sup><https://goo.gl/mSe4rf>, retrieved July 26, 2018.

(see discussion below in Section 3.4 on the potentially critical role of regridded output). This element of the DRS will allow us to track the usage of the *regridded subset* of data, and assess the relative popularity of native-grid vs. standard-grid output.

### 3.4 CMIP6 data volumes

As noted, extrapolations based on CMIP3 and CMIP5 lead to some alarming trends in data volume (see e.g., Overpeck et al., 2011). As seen in their Figure 2, model output such as those from CMIPs are beginning to rival observational data volume. As noted in the Introduction, a particular problem for our community is the diverse and very large user base for the data, many of whom are not climate specialists, but downstream users of climate data studying the impacts of climate change. This stands in contrast to other fields with comparably large data holdings: data from the Large Hadron Collider (e.g., Aad et al., 2008) for example, is primarily consumed by high energy physicists and not of direct interest to scientists in unrelated fields.

A rigorous approach is needed to the estimation of future data volumes, rather than simple extrapolation. Contributions to increase in data volume include the systematic increase in model resolution and complexity of the experimental protocol and data request. We consider these separately:

**Resolution** The median horizontal resolution of a CMIP model tends to grow with time, and is expected to be more typically 100 km in CMIP6, compared to 200 km in CMIP5. The vertical resolution grows in a more controlled fashion, at least as far as the data is concerned, as often the requested output is reported on a standard set of atmospheric levels that has not changed much over the years. Similarly the temporal resolution of the data request does not increase at the same rate as the model timestep: monthly averages remain monthly averages. A doubling of model resolution leads therefore to a quadrupling of the data volume, in principle. But typically the temporal resolution of the model (though not the data) is doubled as well, for reasons of numerical stability. Thus, for an  $N$ -fold increase in horizontal resolution, we require an  $N^3$  increase in computational capacity, which will result in an  $N^2$  increase in data volume. We argue therefore, that data volume  $V$  and computational capacity  $C$  are related as  $V \sim C^{\frac{2}{3}}$ , purely from the point of view of resolution. The exponent is even smaller if vertical resolution increases are assumed. This is because most 3D model output is requested on sets of “standard levels” and thus the output fields do not scale with the number of model levels (see discussion in the CMIP6 Output Grid Guidance document<sup>14</sup>).

If we then assume that centers will experience an 8-fold increase in  $C$  between CMIPs (which is optimistic in an era of tight budgets), we can expect a 4-fold increase in data volume. However, this is not what we experienced between CMIP3 and CMIP5. What caused that extraordinary 50-fold increase in data volume?

**Complexity** The answer lies in the complexity of CMIP: the complexity of the data request, and of the experimental protocol. The first component, the data request complexity, is related to that of the science: the number of processes being studied, and the physical variables required for the study. In CPMIP (Balaji et al., 2017), we have attempted a rigorous definition of this complexity, measured by the number of physical variables simulated by the model. This, we argue, grows not smoothly like resolution, but in very distinct generational step transitions, such as the one from atmosphere-ocean

---

<sup>14</sup><https://goo.gl/wVtm5t>, retrieved July 26, 2018.

models to Earth system models, which involved a substantial jump in complexity, the number of physical, chemical, and biological species being modeled, as shown in Balaji et al. (2017). The dramatic increase in data volume between CMIP3 and CMIP5 was also due to these causes. Many models of the CMIP5 era added atmospheric chemistry and aerosol-cloud feedbacks, sometimes with  $\mathcal{O}(100)$  species. CMIP5 also marked the first time in CMIP that ESMs were used to simulate changes in the carbon cycle and modeling groups performed many more simulations than in CMIP3 with a corresponding increase in years simulated.

The second component of complexity is the experimental protocol, and the number of experiments themselves when comparing CMIP5 and CMIP6. With the new structure of CMIP6, with a DECK and 23 endorsed MIPs, this has grown tremendously. We propose as a measure of experimental complexity, the *total number of simulated years (SYs)* conforming to a given protocol. Note that this too is gated by  $C$ : modeling centers usually make tradeoffs between experimental complexity and resolution in deciding their level of participation in CMIP6, discussed in Balaji et al. (2017).

Two further steps have been proposed toward ensuring sustainable growth in data volumes. The first of these is the consideration of standard horizontal resolutions for saving data, as is already done for vertical and temporal resolution in the data request. Cross-model analyses already cast all data to a common grid in order to evaluate it as an ensemble, typically at fairly low resolution. The studies of Knutti and colleagues (e.g., Knutti et al. (2017)) are typically performed on relatively coarse grids. Accordingly for most purposes atmospheric data on the ERA-40 grid ( $2^\circ \times 2.5^\circ$ ) would suffice, with of course exceptions for experiments like those called for by HighResMIP (Haarsma et al., 2016). A similar conclusion applies for ocean data (the World Ocean Atlas  $1^\circ \times 1^\circ$  grid), with extended discussion of the benefits and losses due to regridding (see Griffies et al., 2014, 2016).

This has not been mandated for CMIP6 for a number of reasons. Firstly, regridding is burdensome on many grounds: It requires considerable expertise to choose appropriate algorithms for particular variables, for instance, we may need ones that guarantee exact conservation for scalars or preservation of streamlines for vector fields may be a requirement; and it can be expensive in terms of computation and storage. Secondly, regridding is irreversible (thus amounting to “lossy” data reduction) and non-commutative with certain basic arithmetic operations such as multiplication (i.e., the product of regridded variables does not in general equal the regridded output of the product computed on the native grid). This can be problematic for budget studies. However, the same issues would apply for time-averaging and other operations long used in the field: much analysis of CMIP output is performed on monthly-averaged data, which is “lossy” compression along the time axis relative to the model’s time resolution.

These issues have contributed to a lack of consensus in moving forward, and the recommendations on regridding remain in flux. The CMIP6 Output Grid Guidance document<sup>15</sup> outlines a number of possible recommendations, including the provision of “weights” to a target grid. Many of the considerations around regridding, particularly for ocean data in CMIP6, are discussed at length in Griffies et al. (2016).

---

<sup>15</sup><https://goo.gl/wVtm5t>, retrieved July 26, 2018.

There is a similar lack of consensus around common *calendar* for particular experiments. In cases such as a long-running control simulation where all years are equivalent and of no historical significance, it is customary in this community to use simplified calendars – such as a Julian, a “no leap” (365-day) or “equal-month” (360-day) calendar – rather than the Gregorian, which can vastly simplify analysis. However, comparison across datasets using incommensurate calendars can be a frustrating  
5 burden on the end-user. There is no consensus at this point on this issue.

As outlined below in Section 6, both ESGF data nodes and the creators of secondary repositories are given considerable leeway in choosing data subsets for replication, based on their own interests. The tracking mechanisms outlined in Section 5.2 below will allow us to ascertain, after the fact, how widely used the native grid data may be *vis-à-vis* the regridded subset, and allow us to recalibrate the replicas, as usage data becomes available. We note also that the providers of at least one of  
10 the standard metrics packages (ESMValTool, Eyring et al., 2016a) have expressed a preference of standard grid data for their analysis, as regridding from disparate grids increases the complexity of their already overburdened infrastructure.

A second method of data reduction for the purposes of storage and transmission, is the issue of data compression. netCDF4, which is the recommended for CMIP6 data, includes an option for lossless compression or deflation (Ziv and Lempel, 1977) that relies on the same technique used in standard tools such as `gzip`. In practice, the reduction in data volume will depend  
15 upon the “entropy” or randomness in the data, with smoother data being compressed more.

Deflation entails computational costs, not only during creation of the compressed data, but also every time the data are re-inflated. There is also a subtle interplay with precision: for instance temperatures usually seen in climate models appear to deflate better when expressed in Kelvin, rather than Celsius, but that is due to the fact that the leading order bits are always the same, and thus the data is actually less precise. Deflation is also enhanced by reorganizing (“shuffling”) the data internally into  
20 chunks that have spatial and temporal coherence.

Some in the community argue for the use of more aggressive *lossy* compression methods (Baker et al., 2016), but the community, after consideration, believes the loss of precision entailed by such methods, and the consequences for scientific results, require considerably more evaluation by the community before such methods can be accepted as common practice. However, as noted above, some lossy methods of data reduction such as time-averaging, have long been common practice.

Given the options above, we undertook a systematic study of the behavior of typical model output files under lossless  
25 compression, the results of which are publicly available<sup>16</sup>. The study indicates that standard `zlib` compression in the netCDF4 library with the settings of `deflate=2` (relatively modest, and computationally inexpensive), and `shuffle` (which ensures better spatiotemporal homogeneity) ensures the best compromise between increased computational cost and reduced data volume. For an ESM, we expect a total savings of about 50%, with ocean, ice, land realms getting the most savings (owing  
30 to large areas of the globe that are masked), and atmospheric data the least. This 50% estimate has been verified with sample output from some models preparing for CMIP6.

The DREQ<sup>17</sup> alluded to above in Section 3 allows us to make a systematic assessment of these considerations. The tool expects one to input a model’s resolution along with the experiments that will be performed and the data one intends to

---

<sup>16</sup><https://goo.gl/qkdDnn>, retrieved July 26, 2018.

<sup>17</sup><https://goo.gl/iNBQ9m>, retrieved July 26, 2018.

save (using DREQ's *priority* attribute). With this information one may calculate the data volume that will be produced. For instance, analyses available [DREQ site](#)<sup>18</sup> indicate that if a center were to undertake every single experiment (all tiers) and save every single variable requested (all priorities) at a “typical” resolution, it would generate about 800 TB of data, using the guidelines above. Given 75 participating models, this translates to an upper bound of 60 PB for the entire CMIP6 archive, though in practice most centers are planning to perform a subset of experiments, and save a subset of variables, based on their scientific priorities and available computational and storage resources. The WIP carried out a survey of modeling centers in 2016, asking them for their expected model resolutions, and intentions of participating in various experiments. Based on that survey, we initially have forecast a compressed data volume of 18 PB for CMIP6. This number, 18 PB, is about 6 times the CMIP (including all CMIPs, but the dominant component is CMIP5) archive size, and can be explained in terms of the compounding of modest increases in resolution and complexity, as explained above. Causes for a dramatic increase in data volume between CMIP3 and CMIP5 were noted above. There is no comparable jump between CMIP5 and CMIP6. CMIP6's innovative DECK/endorsed-MIP structure should thus be seen as an extension and an attempt to impose a rational order on CMIP5, rather than a qualitative leap.

Similar analyses were undertaken at PCMDI for CMIP5. For CMIP6, tools have been made available that put this capability in the hands of the modeling centers themselves. In particular, the cross-MIP data requests (variables requested by one MIP from another MIP, or the DECK) require a sophisticated understanding of the experimental protocols. The experience in many modeling centers currently is that data volume estimates are only available when the production runs have begun. Reliable estimates *ahead of time* based on nothing more than the experimental protocols and model resolutions will be of use for planning and acquisitions.

It should be noted that reporting output on a lower resolution standard grid (rather than the native model grid) could shrink this volume 10-fold, to 1.8 PB. This is an important number, as will be seen below in Section 6: the managers of Tier 1 nodes (the largest nodes in the federation) have indicated that 2 PB is about the practical limit for replicated storage of combined data from all models. This target is achievable based on compression and the use of standard grids. Both of these (the use of netCDF4 compression and regriding) remain merely recommendations, and the centers are free to choose whether or not to compress and regrid.

## 4 Licensing

The licensing policy in force for CMIP6 is based on an examination of data usage patterns in CMIP5. First, while the licensing policy called for registration and acceptance of the terms of use, a large fraction, perhaps a majority of users, actually obtained their data not directly from ESGF, but from third-party copies, such as the “snapshots” alluded to above in Item 7, Section 2. Those users accessing the data indirectly, as shown in Figure 2, relied on user groups or their home institutions to make secondary repositories that could be more conveniently accessed. The WIP [CMIP6 Licensing and Access Control](#)<sup>19</sup> position

<sup>18</sup>[http://clipc-services.ceda.ac.uk/dreq/tab01\\_3\\_3.html](http://clipc-services.ceda.ac.uk/dreq/tab01_3_3.html), retrieved July 26, 2018.

<sup>19</sup><https://goo.gl/7vHsPU>, retrieved July 26, 2018.

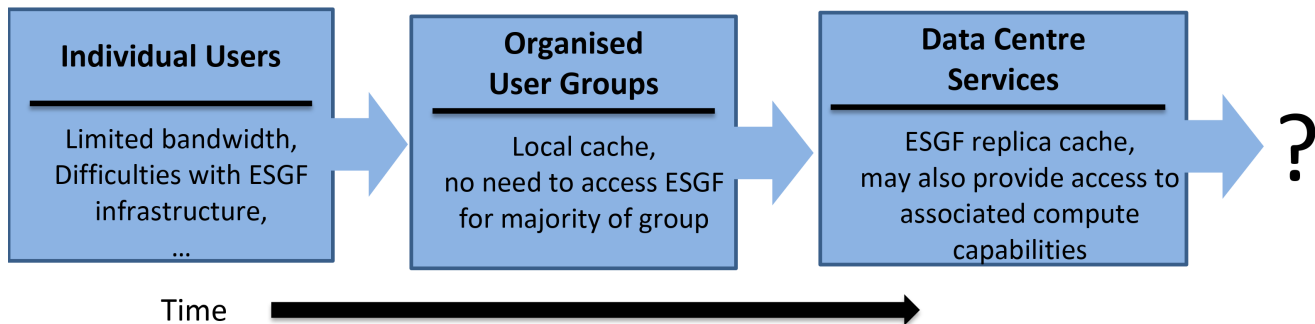

**Figure 2.** Typical data access pattern in CMIP5 involved users making local copies, and user groups making institutional-scale caches from ESGF. Figure courtesy Stephan Kindermann, DKRZ, adapted from WIP Licensing White Paper.

paper refers to the secondary repositories as “dark” and those obtaining CMIP data from those repositories as “dark users” who are invisible to the ESGF system. While this appears to subvert the licensing and registration policy put in place for CMIP5, this should not be seen as a “bootleg” process: it is in fact the most efficient use of limited network bandwidth at the user sites. The data archive snapshots will host data and offload some of the network provisioning requirements from ESGF nodes themselves.

We wish, however, to retain the ability for users of these “dark” repositories to benefit from the augmented provenance provided by infrastructure updates, such as being notified of data retractions or replacements in the case that contributed datasets are found to be erroneous and replaced.

The proposed licensing policy inverts this and removes the impossible task of license enforcement from the distribution system, and embraces the “dark” repositories and users. To quote the WIP position paper:

The proposal is that (1) a data license be embedded in the data files, making it impossible for users to avoid having a copy of the license, and (2) the onus on defending the provisions of the license be on the original modeling center...

Licenses are now embedded in the files, and all repositories, whether sanctioned or “dark”, can be data sources, as seen below in the discussion of replication (Section 6. In the embedded license approach, modeling centers are offered two choices of *Creative Commons* licenses: data covered by the [Creative Commons Attribution “Share Alike” 4.0 International License](https://creativecommons.org/licenses/by/4.0/)<sup>20</sup> will be freely available; for centers with more restrictive policies, the [Creative Commons Attribution “NonCommercial Share Alike” 4.0 International License](https://creativecommons.org/licenses/by-nc/4.0/)<sup>21</sup>, which restricts the data to non-commercial use. Further sharing of the data is allowed, as the license travels with the data. The PCMDI website provides a link to the current [CMIP6 Terms of Use webpage](https://pcmdi.llnl.gov/CMIP6/TermsOfUse)<sup>22</sup>.

<sup>20</sup><https://goo.gl/CY5m2v>, retrieved July 26, 2018.

<sup>21</sup><https://goo.gl/KUNUKq>, retrieved July 26, 2018.

<sup>22</sup><https://pcmdi.llnl.gov/CMIP6/TermsOfUse>, retrieved July 26, 2018.

## 5 Citation and provenance

As noted in Section 2, citation requirements flow from two underlying considerations: one, to provide proper credit and formal acknowledgment of the authors of datasets; and the other, to enable rigorous tracking of data provenance and data usage. The tracking facilitates scientific reproducibility and traceability, as well as enabling statistical analyses of dataset utility.

5 In addition to clearly identifying what data have been used in research studies and who deserves credit for providing that data, it is essential that the data be examined for quality and that documentation be made available describing the model and experiment conditions under which it was generated. These subjects are addressed in the four position papers summarized in this section.

The principles outlined above are well-aligned with the [Joint Declaration of Data Citation Principles](#)<sup>23</sup> formulated by the  
10 Force11 (The Future of Research Communications and e-Scholarship) Consortium, which has acknowledged the rapid evolution of digital scholarship and archival, as well as the need to update the rules of scholarly publication for the digital age. We are convinced that not only peer-reviewed publications but also the data itself should now be considered a first-class product of the research enterprise. This means that data requires curation and should be treated with the same care as journal articles. Moreover, most journals and academies now insist that data used in the literature be made publicly available for independent  
15 inquiry and reproduction of results. New services like [Scholix](#)<sup>24</sup> are evolving to support the exchange and access of such data-data and data-literature interlinking.

Given the complexity of the CMIP6 data request, we expect, as shown in Section 3.4, a total dataset count of  $\mathcal{O}(10^6)$ . Because dozens of datasets are typically used in a single scientific study, it is impractical to cite each dataset individually in the same way as individual research publications are acknowledged. The requirement based on this finding is for a mechanism of  
20 citing data and giving credit to data providers that relies on a rather coarse granularity, while at the same time offering another option at a much finer granularity for recording the specific files and datasets used in a study.

In the following, two distinct types of persistent identifiers (PIDs) are discussed: DOIs, which can only be assigned to data that comply with certain standards for citation metadata and curation, and the more generic “[Handles](#)”<sup>25</sup> that have fewer constraints and may be more easily adapted for a particular use. The Handle system, as explained below in Section 5.2 allows  
25 unique PIDs to be assigned to datasets at the point of publication. Technically both types of PIDs rely on the underlying global Handle System to provide services (e.g., to resolve the PIDs and provide associated metadata, such as the location of the data itself).

### 5.1 Persistent identifiers for acknowledgment and citation

Based on earlier phases of CMIP, some datasets initially contributed to the CMIP6 archive will be flawed (due, for example, to  
30 errors in processing) and therefore will not accurately represent a model’s behavior. When errors are uncovered in the datasets, they may be replaced with corrected versions. Similarly, additional datasets may be added to an initially incomplete collection

---

<sup>23</sup><https://goo.gl/Pzb7F6>, retrieved July 26, 2018.

<sup>24</sup><http://www.scholix.org>, retrieved July 26, 2018.

<sup>25</sup><https://www.dona.net/handle-system>, retrieved July 26, 2018.



of datasets. Thus, initially at least, the DOIs assigned for the purposes of citation and acknowledgement will represent an evolving underlying collection of datasets.

The recommendations, detailed in the [CMIP6 Data Citation and Long Term Archival](#)<sup>26</sup> position paper, recognize two phases to the process of assigning DOI's to collections of datasets: an initial phase, when the data have been released and preliminary community analysis is still underway and a second stage when most errors in the data have been identified and corrected. Upon reaching stage two, the data will be transferred to long-term archival (LTA) of the IPCC Data Distribution Centre (IPCC DDC) and deemed appropriate for interdisciplinary use (e.g., in policy studies). The timing of the planned DDC snapshot is linked to the IPCC AR6 schedule.

For evolving dataset aggregations, the data citation infrastructure relies on information collected from the data providers and uses the [DataCite](#)<sup>27</sup> data infrastructure to assign DOIs and record associated metadata. DataCite is a leading global non-profit organisation that provides persistent identifiers (DOIs) for research data. The DOIs will be assigned to:

1. aggregations that include all the datasets contributed by one model from one institution from all of a single MIP's experiments, and
2. aggregations that include all datasets contributed by one model from one institution generated in performing one experiment (which might include one or more simulations).

These aggregations are dynamic as far as the PID infrastructure is concerned: new elements can be added to the aggregation without modifying the PID. As an example, for the coarser of the two aggregations defined above, the same PID will apply to an evolving number of simulations as new experiments are performed with the model. This PID architecture is shown in [Figure 3](#). Since these collections are dynamic, citation requires authors to provide a version reference.

For the stable dataset collections, the data citation infrastructure requires some additional steps to meet formal requirements. First, we ensure that there has been sufficient community examination of the data (through citations in published literature, for instance) to qualify it as having been peer-reviewed. Second, further steps are undertaken to assure important information exists in ancillary metadata repositories, including, for example, documentation (ES-DOC, errata and citation) and to provide quality assurance of data and metadata consistency and completeness (see [Section 5.3](#)). Once these criteria have been satisfied, a DOI will be issued by the IPCC DDC hosted by DKRZ. These dataset collections will meet the stringent metadata and documentation requirements of the IPCC DDC. Since these collections are static, no version reference is required in a citation. Should errors be found subsequently, they will be corrected in the data and published under a new DOI. The original DOI and its related data are still available but are signed as superseded with link to the corrected data.

For CMIP6, the initially assigned DOIs (associated with evolving collections of data) must be used in research papers to properly give credit to each of the modeling groups providing the data. Once a stable collection of datasets has met the higher standards for long-term curation and quality, the DOI assigned by the IPCC DDC should be used instead.

The data citation approach is described in greater detail in [Stockhouse and Lautenschlager \(2017\)](#).

---

<sup>26</sup><https://goo.gl/BFn9Hq>, retrieved July 26, 2018.

<sup>27</sup><https://www.datacite.org/doi.html>, retrieved July 26, 2018.

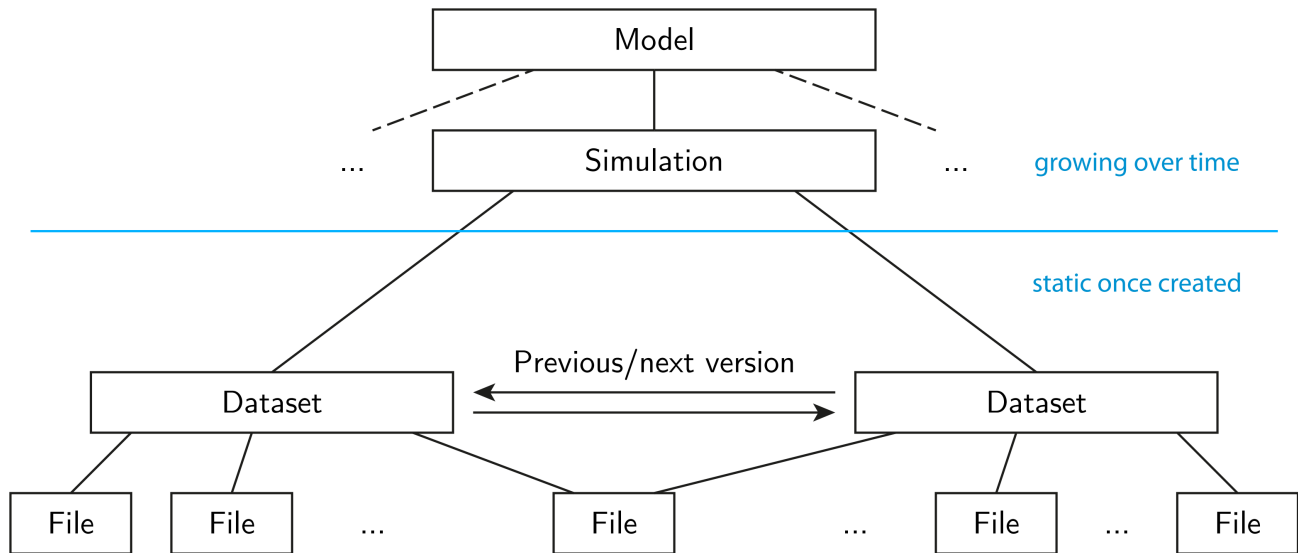

**Figure 3.** Schematic PID architecture, showing layers in the PID hierarchy. In the lower layers of the hierarchy, PIDs are static once generated, and new datasets generate new versions with new PIDs. Each file carries a PID and each collection (dataset, simulation, ..) is related to a PID. Resolving the PID in the Handle server guides the user to the file or the landing page describing the collection. Each box in the figure will be addressed uniquely by its PID.

## 5.2 Persistent identifiers for tracking, provenance, and curation

Although the DOIs assigned to relatively large aggregations of datasets are well suited for citation and acknowledgment purposes, they are not issued at fine enough granularity to meet the scientific imperative that published results should be traceable and verifiable. Furthermore, management of the CMIP6 archive requires that PIDs be assigned at a much finer granularity than the DOIs. For these purposes, PIDs recognized by the global Handle registry will be assigned at two different levels of granularity:

A unique Handle will be generated each time a new CMIP6 data file is created, and the Handle will be recorded in the file's metadata (in the form of a netCDF global attribute named `tracking_id`). At the time the data is published, the `tracking_id` will be processed by the CMIP6 Handle service infrastructure and recorded in the ESGF metadata catalog. Another Handle will subsequently be assigned at somewhat coarser granularity to each aggregation of files containing the data from a single variable sampled at a single frequency from a single model running a single experiment. In ESGF terminology, this collection of files is referred to as an *atomic dataset*.

As described in the [CMIP6 Persistent Identifiers Implementation Plan](#)<sup>28</sup> position paper, a Handle assigned at either of these two levels of the PID hierarchy identifies a static entity; if any file associated with a Handle is altered in any way a new Handle

<sup>28</sup><https://goo.gl/miUREw>, retrieved July 26, 2018.

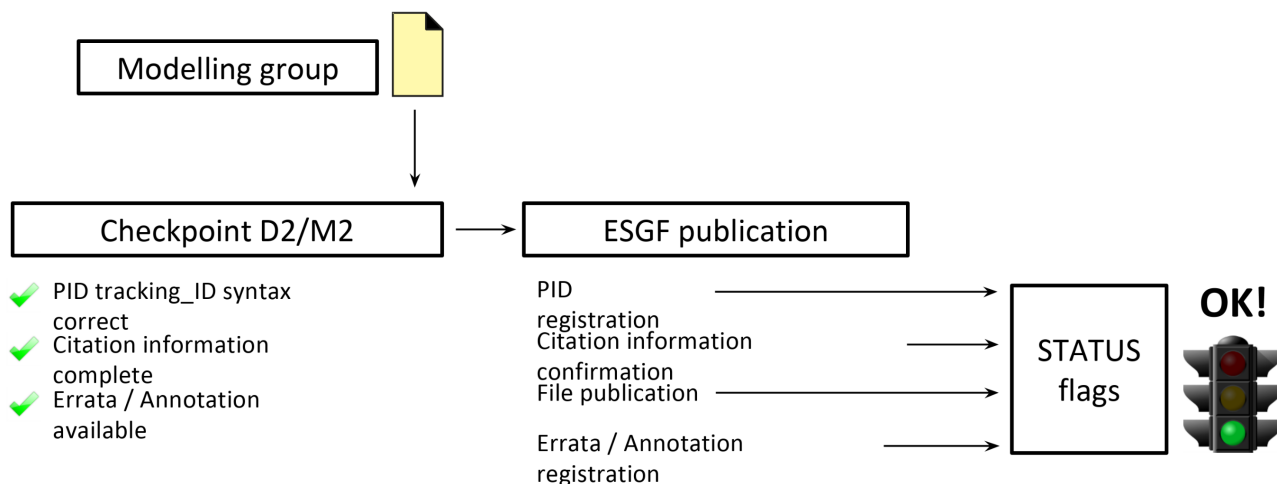

**Figure 4.** PID workflow, showing the generation and registry of PIDs, with checkpoints where compliance is assured.

must be created. The PID infrastructure is also central to the replication and versioning strategies, as described in Section 6 and Section 7 below. Furthermore, as a means of recording provenance and enabling tracking of dataset usage, authors are urged to include as supplementary material attached to each CMIP6-based publication a PID list (a flat list of all PIDs referenced).

The implementation plan describes methods for generating and registering Handles using an asynchronous messaging system known as RabbitMQ. This system, designed in collaboration with ESGF developers and shown in Figure 4, guarantees, for example, that PIDs are correctly generated in accordance with the versioning guidelines. The CMIP6 handle system builds on the idea of tracking-ids used in CMIP5, but with a more rigorous quality control to ensure that new PIDs are generated when data are modified. The dataset and file Handles are also associated with basic metadata, called PID Kernel information (Zhou et al., 2018), which facilitate the recording of basic provenance information. Datasets and files point to each other to bind the granularities together. In addition, dataset kernel information refers to previous and later versions, errata information and replicas, explained in more detail in the position paper.

### 5.3 Quality Assurance

Quality assurance (QA) encompasses the entire data lifecycle, as depicted in Figure 5. At all stages, a goal is to capture provenance information that will enable scientific reproducibility. Further, as noted in Item 2 in Section 2, the QA procedures should uncover issues that might undermine trust in the data by those outside the Earth system modeling community if errors were left unreported.

QA must ensure that the data and metadata correctly reflect a model's simulation, so that it can be reliably used for scientific purposes. As depicted in Figure 5, the first stage of QA is the responsibility of the data producer: in fact the cycle of model

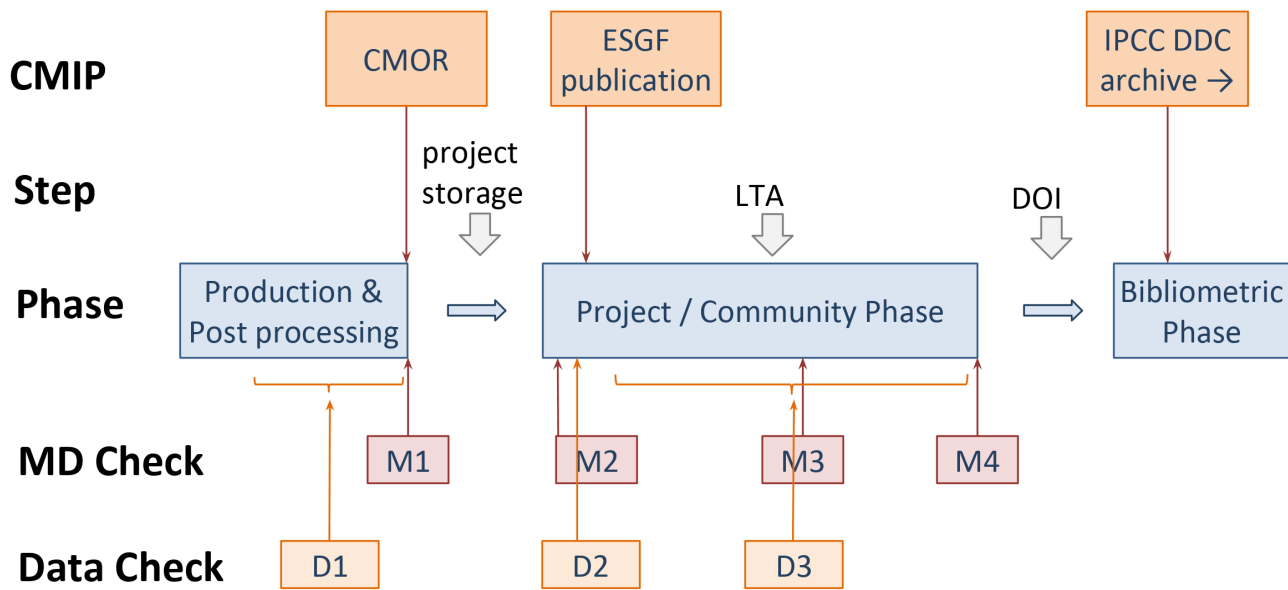

**Figure 5.** Schematic of the phases of quality assurance, with earlier stages in the hands of modeling centers (left), and more formal long-term data curation stages at right. Quality assurance is applied both to the data (D, above) as well as the metadata (M) describing the data. Figure drawn from the WIP’s Quality Assurance position paper.

development and diagnosis is the most critical element of QA. The second aspect is ensuring that disseminated data include common metadata based on common CVs, which will enable consistent treatment of data from different groups and institutions. These requirements are directly embedded in the ESGF publishing process and in tools such as [CMOR](#)<sup>29</sup> (and its validation component, [PrePARE](#)<sup>30</sup>). These checks (the D1 and M1 phases of QA in Figure 5) ensure that the data conform to the CMIP6 Data Request specifications, conform to all naming conventions and CVs, and follow the mandated structure for organization into a common directory structure. As noted in Section 3, many modeling centers have chosen to embed these steps directly in their workflows to ensure conformance with the CMIP6 as the models are being run and their output processed.

At this point, as noted in Figure 5, control is ceded to the ESGF system, where designated QA nodes (ESGF data nodes where additional services are turned on, to certify for the data for citation and long-term archival) perform further QA checks.

A critical step is the assignment of PIDs (Section 5.2, the D2 stage of Figure 4), which is more controlled than in CMIP5 and guarantees that across the data lifecycle, the PIDs will be reliably useful as unique labels of datasets.

Beyond this, further stages of QA will be handled within the ESGF system following procedures outlined in the [CMIP6 Quality Assurance](#)<sup>31</sup> position paper. As described before, once data have been published, the data will be scrutinized by re-

<sup>29</sup><https://cmor.llnl.gov/>, retrieved July 26, 2018.

<sup>30</sup><https://goo.gl/AvvMJx>, retrieved July 26, 2018.

<sup>31</sup><https://goo.gl/eEr8bS>, retrieved July 26, 2018.

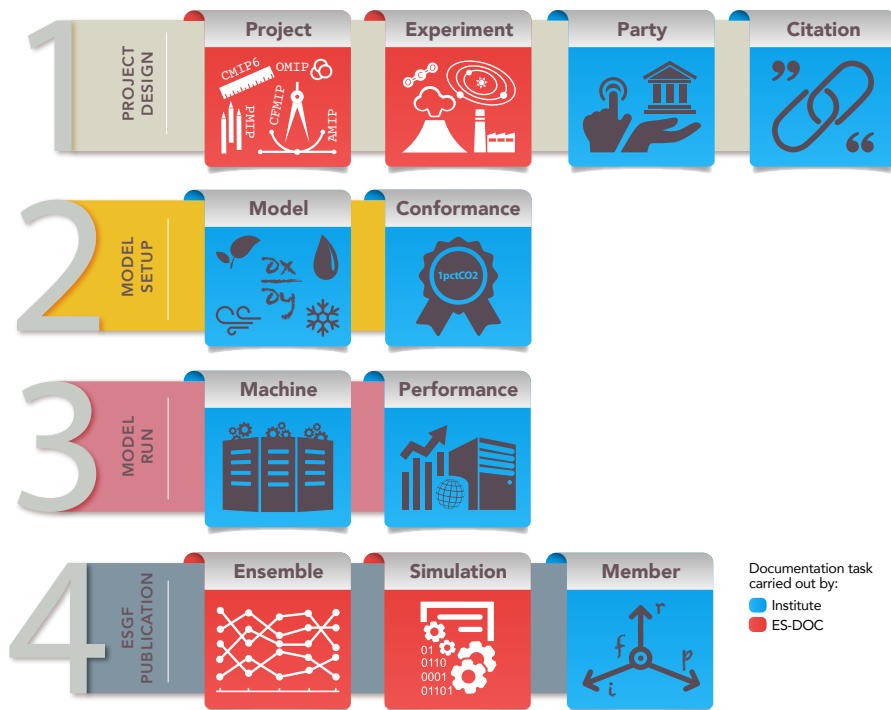

**Figure 6.** Elements of ES-DOC documentation. Rows indicate phases of the modeling process being documented, and box colors indicate the parties responsible for producing the documentation (see legend). Figure courtesy Guillaume Levavasseur, IPSL

searchers in what can be considered an ongoing period of community-wide scientific QA of the data. During this period, modeling centers may correct errors and provide new versions of datasets. In the final stage, the data pass into long term archival (LTA) status, described as the “bibliometric” phase in Figure 5. Just prior to LTA, the system will verify minimum standards of provenance documentation. This is described in the next section.

#### 5 5.4 Documentation of provenance

As noted earlier in Section 3, for data to become a first-class scientific resource, the methods of their production must be documented to the fullest extent possible. For CMIP6, this includes documenting both the models and the experiments. While traditionally this is done through peer-reviewed literature, which remains essential, we note that to facilitate various aspects of search, discovery and tracking of datasets, there is an additional need for structured documentation in machine readable form.

10 In CMIP6, the documentation of *experiments*, *models* and *simulations* is done through the Earth System Documentation (ES-DOC<sup>32</sup>, Guilyardi et al., 2013) Project. The various aspects of model documentation are shown in Figure 6, and in greater detail

<sup>32</sup><https://goo.gl/WNwKD9>, retrieved July 26, 2018.

in the WIP position paper on [ES-DOC](#)<sup>33</sup>. The CMIP6 experimental design has been translated into structured text documents, already available from ES-DOC. ES-DOC has constructed CVs for the description of the CMIP6 standard model realms (CMIP terminology for climate subsystems, such as “ocean” or “atmosphere”), including a set of short tables (*specialisations*, in ES-DOC terminology) for each realm. The specialisations are a succinct and structured description of the model physics.

5 Ideally, modeling groups would integrate with their model development process their provision of documentation to ES-DOC. This will better ensure the accuracy and consistency of the documentation. ES-DOC provides a variety of user interfaces to read and write structured documentation that conforms with the Common Information Model (CIM) of [Lawrence et al. \(2012\)](#). As models evolve or differentiate (for example, an Earth system model derived from a particular general circulation model), branches and new versions of the documentation can be produced and it will be possible to display, annotate, and add new

10 entries in the genealogy of a model in a manner familiar to anyone who works with version control software like `git`.

A critical element in the ES-DOC process is the documentation of *conformances*: steps undertaken by the modeling centers to ensure that the simulation was conducted as called for by the experiment design. It is here that we rigorously document which input datasets were used in a simulation (e.g., the version of each of the forcing datasets, see [Durack et al., 2018](#)). The conformances will be an important element in guiding selection of subsets of CMIP6 model results for particular research

15 studies. A researcher might, for example, choose to subselect only those models that used a particular version of the forcing datasets that are imposed as part of the experimental protocol. The conformances will continue to grow in importance under the CMIP vision that the DECK will provide an ongoing foundation on which to build a series of future CMIP phases (shown schematically in Figure 1 of [Eyring et al., 2016a](#)). The conformances will be essential in enabling studies across model generations.

20 The method of capturing the conformance documentation is a two-stage process that has been designed to minimize the amount of work required by a modeling center. The first stage is to capture the many conformances common to all simulations. ES-DOC will then automatically copy these common conformances to multiple simulations thereby eliminating duplicated effort. This is followed by a second stage in which those conformances that are specific to individual experiments or simulations are collected.

25 While this method of documentation is unfamiliar to many, such methods are likely to become common and required practice in the maturing digital age as part of best scientific practices. Documentation of software validation (see e.g [Peng, 2011](#)) and structured documentation of complete scientific workflows that can be independently read and processed are both becoming more common (see the special issue on the “Geoscience Paper of the Future”, [David et al., 2016](#)). We have noted earlier (see Item 3 in Section 2) the special importance in climate research today of documenting how results have been obtained

30 and enabling results to be reproduced by others. Rigorous documentation remains a hardy bulwark against challenges to the scientific process.

In keeping with the “dataset-centric rather than system-centric” approach (Item 7 in Section 2), a user will be directly linked to documentation from each dataset. This is done in CMIP6 by adding a required global attribute `further_info_url` in file headers pointing to the associated CIM document, which will serve as the landing page for documentation from which

---

<sup>33</sup><https://goo.gl/S3vVxE>, retrieved July 26, 2018.

further exploration (by humans or software) will take place. The form of this URL is standard and can be software-generated: CMOR, for instance, will automatically add it. The existence and functioning of the landing page is assured in Stage M3 of Figure 5.

## 6 Replication

- 5 The replication strategy is covered in the [CMIP6 Replication and Versioning](#)<sup>34</sup> position paper. The recommendations therein are based on the following *primary* goal:
- Ensuring at least one copy of a dataset is present at a stable ESGF node with a mission of long-term maintenance and curation of data. The total data storage resources planned across the Tier 1 nodes in the CMIP6 era is adequate to support this requirement, though some data will likely be held on accessible tape storage rather than spinning disk.
- 10 In addition, we have articulated a number of secondary goals:
- Enhancing data accessibility across the ESGF (e.g. Australian data easily accessible to the European continent despite the long distance);
  - Enabling each Tier 1 data node to enact specific policies to support their local objectives;
  - Ensuring that the most widely requested data is the most accessible across the ESGF federation (of course, any dataset will be available at least on its original publication datanode);
  - 15 – Enabling large-scale data analysis across the federation (see Item 4 in Section 2);
  - Ensuring continuity of data access in the event of individual node failures;
  - Enabling network load-balancing and enhanced performance;
  - Reducing the manual workload related to replication;
  - 20 – Building a reliable replication mechanism that can be used not only within the federation, but by the secondary repositories created by user groups (see discussion in Section 4 around Figure 2).

In conjunction with the ESGF and the International Climate Networking Working Group (ICNWG), these recommendations have been translated to a two-pronged strategy.

- The basic toolchain for replication is built on updated versions of the software layers used in CMIP5 including: [synda](#)<sup>35</sup> (formerly *synchrodata*) and Globus Online ([Chard et al., 2015](#)), which are based on underlying data transport mechanisms such as [gridftp](#)<sup>36</sup> and the older and now deprecated protocols like `wget` and `ftp`.

---

<sup>34</sup><https://goo.gl/Bs4Qou>, retrieved July 26, 2018.

<sup>35</sup><https://github.com/Prodiguier/synda>, retrieved July 26, 2018.

<sup>36</sup><https://goo.gl/Z8xcfE>, retrieved July 26, 2018.

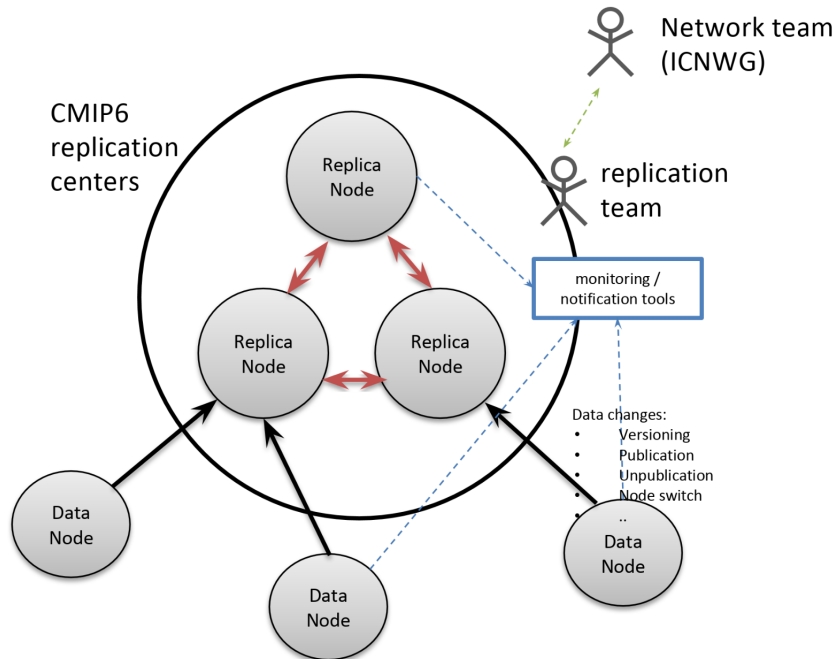

**Figure 7.** CMIP6 replication from data nodes to replica centers and between replica centers coordinated by a CMIP6 replication team, under the guidance of the CDNOT.

As before, these layers can be used for *ad hoc* replication by sites or user groups. For *ad hoc* replication, there is no obvious mechanism for triggering updates or replication when new data are published (or retracted, see Section 7 below). Therefore, designated *replica nodes* will maintain a protocol for automatic replication, shown in Figure 7.

Given the nature of some of the secondary goals listed above, it would not be appropriate to prescribe which data should be replicated by each center. Rather, the plan should be flexible to accommodate changing data use profiles and resource availability. A replication team under the guidance of the CDNOT will coordinate the replication activities of the CMIP6 data nodes such that the primary goal is achieved and an effective compromise for the secondary goals is established.

The International Climate Network Working Group (ICNWG), formed under the Earth System Grid Federation (ESGF), helps set up and optimize network infrastructures for ESGF climate data sites located around the world. For example prioritising the most widely requested data for replication can best be done based on operational experience and will of course change over time. To ensure that the replication strategy is responding to user need and data node capabilities, the replication team will maintain and run a set of monitoring and notification tools assuring that replicas are up-to-date. The CDNOT is tasked with ensuring the deployment and smooth functioning of replica nodes.



A key issue that emerged from discussions with node managers is that the replication target has to be of sustainable size. A key finding is that a replication target about 2 PB in size is the practical (technical and financial) limit for CMIP6 online (disk) storage at any single location. Replication beyond this may involve offline storage (tape) for disaster recovery.

Based on experience in CMIP5, it is expected that a number of “special interest” secondary repositories will hold selected subsets of CMIP6 data outside of the ESGF federation. This will have the effect of widening data accessibility geographically, and by user communities, with obvious benefit to the CMIP6 program. These secondary repositories will be encouraged and supported where it does not undermine CMIP6 data management and integrity objectives.

In the new dataset-centric approach, licenses and PIDs remain embedded and will continue to play their roles in the data toolchain even for these secondary repositories.

In CMIP5 a significant issue for users of some third-party archives was that their replicated data was taken as a one-time snapshot (see discussion above in Item 7 in Section 2), and not updated as new versions of the data were submitted to the source ESGF node. Tools have been developed by a number of organisations to maintain locally synchronized archives of CMIP5 data and third party providers should be encouraged to make use of these types of tools to keep the local archives up to date.

In summary, the requirements for replication are limited to ensuring:

- that there is at least one instance of each submitted dataset stored at a Tier 1 node (in addition to its primary residence) within a reasonably short time period following submission;
- that subsequent versions of submitted datasets are also replicated by at least one Tier 1 node (see versioning discussion below in Section 7);
- that creators of secondary repositories take advantage of the replication toolchain described here, to maintain replicas that can be kept up to date, rather than one-time snapshots
- that the CDNOT is the recognized body to manage the operational replication strategy for CMIP6.

We note that the the ESGF PID registration service is part of the ESGF data publication implementation, and not exclusive to CMIP6. The PID registration service works for all NetCDF-CF files which carry a PID as `tracking_id` field. This is agreed for all CMIP6 data files. However, the ESGF PID registration service is not exclusively applicable for CMIP6 model data file but can also be used for new data sets, subsets, averages and so forth providing the data are in NetCDF-CF format with a PID from the Handle service in the `tracking_id`. Once the data files passed the ESGF PID registration service these files may easily be matter of overvalue services like building collections in the PID hierarchy as given in Figure 3. In general all files as digital objects can be assigned a PID and registered in the CNRI Handle server. Vice versa, these objects (files) can be uniquely resolved by the Handle server providing the PID is known. That means the PID service allows for stable and transparent data access independently from the actual storage location. The storage location is part of the PID meta data which are integrated in the in the Handle server. The PID metadata generation and registration is part of the ESGF registration service for NetCDF-CF files but in general the PID architecture is not restricted to them. It is open for all digital objects.

Thus, CMIP6 is the first implementation of the PID service in a larger data project and ESGF provides in parallel the classical data access via the Data Reference Syntax outlined in the [CMIP6 Global Attributes, DRS, Filenames, Directory Structure, and CVs<sup>37</sup>](#) position paper.

## 7 Versioning

5 Versioning strategy (see the [CMIP6 Replication and Versioning<sup>38</sup>](#) position paper) is based on the principle (Section 2) of scientific reproducibility. Recognizing that errors may be found after datasets have been distributed, erroneous datasets that may have been used downstream will continue to be publicly available, but marked as superseded. This will allow users to trace the provenance of published results, even if those point to retracted data; and further allow the possibility of *a posteriori* correction of such results.

10 A consistent versioning methodology across all the ESGF data nodes is required to satisfy these objectives. We note that inconsistent or informal versioning practices at individual nodes would likely be invisible to the ESGF infrastructure (e.g., yielding files that look like replicas, but with inconsistent data and checksums), which would inhibit traceability across versions.

Building on the replication strategy, and in close consultation with the ESGF implementation teams, versioning will leverage the PID infrastructure of Section 5. PIDs are permanently associated with a dataset, and new versions will get a new PID. When  
15 new versions are published, there will be two-way links created within the PID kernel information so that one may query a PID for prior or subsequent versions.

The unit of versioning be an *atomic dataset*: a complete timeseries of one variable from one experiment and one model. The implication is that other variables need not be republished, if the error is found in a single variable. If an entire experiment is retracted and republished, all variables will get a consistent version number. The CDNOT will ensure consistent versioning  
20 practices at all participating data nodes.

### 7.1 Errata

It is worth highlighting in particular the new recommendations regarding errata. Until CMIP5, we have relied on the ESGF system to push notifications to registered users regarding retractions and reported errors. This was found to result in imperfect coverage: as noted in Section 4, a substantial fraction of users are invisible to the ESGF system. Therefore, following the  
25 discussion in Section 2 (see Item 7), we have recommended a design which is dataset-centric rather than system-centric. Notifications are no longer pushed to users; rather they will be able to query the status of a dataset they are working with. An *errata client* will allow the user to enter a PID to query its status; and an *errata server* will return the PIDs associated with prior or posterior versions of that dataset, if any. Details are to be found in the [Errata<sup>39</sup>](#) position paper.

---

<sup>37</sup><https://goo.gl/mSe4rf>, retrieved July 26, 2018.

<sup>38</sup><https://goo.gl/Bs4Qou>, retrieved July 26, 2018.

<sup>39</sup><https://goo.gl/fvVTVo>, retrieved July 26, 2018.

## 8 The future of the global data infrastructure

The WIP was formed in response to the explosive growth of CMIP between CMIP3 and CMIP5, and charged with studying and making recommendations about the global data infrastructure needed to support CMIP6 and the future evolution of intercomparison projects. Our findings reflect the fact that CMIP is no longer a cottage industry, and a more formal approach is needed.

5 Several of the findings have been translated into requirements on the design of the underlying software infrastructure for data production and distribution. We have separated infrastructure development into requirements, implementation and operations phases, and provided recommendations on the most efficient use of scarce resources. The resulting recommendations stop well short of any sort of global governance of this “vast machine”, but list many areas where, with a relatively light touch, beneficial order and control, and resource efficiencies result.

10 One key finding that informs everything is that that universally, it appears that the critical importance of such infrastructure is under-appreciated. Building infrastructure using research funds puts the system in an untenable position, with a fundamental contradiction at its heart: infrastructure by its nature should be reliable, robust, based on what is proven to work, and invisible, whereas scientific research is hypothesis-driven, risky and novel, and its details widely broadcast. While recommendations have been made at the highest level (e.g., [NASEM, 2012](#)), there is little progress on this front to report. Several of the key  
15 pieces of infrastructure software described here are built and tested by volunteers, or short-term project staff.

The central theme of this paper is the inversion of the design of federated data distribution, to make it *dataset-centric rather than system-centric*. We believe that this one aspect of the design considerably reduces systemic risk, and allows the size of the system to scale up and down as resource constraints allow. Individual scientists, or institutions, or consortia, will be able to pool resources and share data at will, with relatively light requirements related to licensing (Section 4) and dataset tracking  
20 (Section 5.2). This relieves a considerable design burden from the ESGF software stack, and further, recognizes that the data ecosystem extends well beyond the reach of any software system and that data will be used and reused in myriad ways outside anyone’s control.

A second key element of the design is the insistence on *machine-readable experimental protocols*. Standards, conventions, and vocabularies are now stored in machine-readable structured text formats like XML and JSON, thereby enabling software  
25 to automate aspects of the process. This meets an existing urgent need, with some modeling centers already exploiting this structured information to mitigate against the overwhelming complexity of experimental protocols. Moreover, this will also enable and encourage unanticipated future use of the information in developing new software tools for exploiting it as technologies evolve. Our ability to predict (whether correctly or not remains to be seen) the expected CMIP6 data volume is one such unexpected outcome.

30 Finally, the infrastructure allows user communities to assess the *costs of participation* as well as the benefits. For example, we believe the new PID-based methods of dataset tracking will allow centers to measure which data has value downstream. The importance of citations and fair credit for data providers is recognized, with a design that facilitates and encourages proper citation practices. Tools have been added and made available that allow centers, and the CMIP itself, to estimate data

requirements of each experimental protocol. Ancillary activities such as CPMIP add to this an accounting of the computational burden of CMIP6.

Certainly not all issues are resolved, and the validation of some of our findings will have to await the outcome of CMIP6. There is no community consensus on some proposed design elements, such as standard grids. Some features long promised, such as server-side analytics (“bringing analysis to the data”) are yet to mature, although many exciting efforts are underway, for instance using cloud technologies. Nevertheless, the discussion in this article provides a sound basis for beginning to think about the future.

The future brings with it new challenges. First among these is an expansion of the data ecosystem. There is an increasing blurring of the boundary between weather and climate as time and space scales merge (Hoskins, 2013). This will increasingly entrain new communities into climate data ecosystems, each with their own modeling and analysis practices, standards and conventions, and other issues. The establishment of the WIP was a crucial step in enhancing the capabilities, standards, protocols and policies around the CMIP enterprise. Earlier discussions on the scope of the WIP also suggested a broader scope for the panel on the longer-term, to coordinate not only the CMIP data aspects (including for example, the CORDEX project (Lake et al., 2017), which also relies upon ESGF for data dissemination) but also the climate prediction (seasonal to decadal) issues and corresponding observational and reanalysis aspects. We would recommend a closer engagement between these communities in planning the future of a seamless global data infrastructure.

A further challenge the WIP, and the community must grapple with is the evolution of scientific publication in the digital age, beyond the peer-reviewed paper. We have noted above that the nature of publication is changing (see e.g David et al., 2016). Journals and academies increasingly insist upon transparency with respect to code and data to ensure reproducibility. In the future, datasets and software with provenance information will be first-class entities of scientific publication, alongside the traditional peer-reviewed article. In fact it is likely that those will increasingly feature in the grey literature and scientific social media: one can imagine blog posts and direct annotations on the published literature around CMIP6 using analysis directly performed on datasets using their PIDs. Data analytics at large scale is increasingly moving toward machine learning and other directly data-driven methods of analysis, which will also be dependent on data labeled with machine-readable metadata. Our community needs to pay increasing heed to the status of their data, metadata, and software in the light of these developments.

Future development of the WIP’s activities beyond the delivery of CMIP6 will include an analysis of how the infrastructure design performed during CMIP6. That analysis, combined with our assessment of technological change and emerging novel applications, will inform future design of infrastructure software, as well as recommendations to the designers of experiments on how best to fit their protocols within resource limitations. The vision, as always, is for an open infrastructure that is reliable and invisible, and allows Earth system scientists to be nimble in the design of collaborative experiments, creative in their analysis, and rapid in the delivery of the results.

## Appendix A: List of WIP position papers

- [CDNOT Terms of Reference](#)<sup>40</sup>: a charter for the CMIP6 Data Node Operations Team. Authorship: WIP.
- [CMIP6 Global Attributes, DRS, Filenames, Directory Structure, and CVs](#)<sup>41</sup>: conventions and controlled vocabularies for consistent naming of files and variables. Authorship: Karl E. Taylor, Martin Juckes, V. Balaji, Luca Cinquini, Sébastien Denvil, Paul J. Durack, Mark Elkington, Eric Guilyardi, Slava Kharin, Michael Lautenschlager, Bryan Lawrence, Denis Nadeau, and Martina Stockhouse, and the WIP.
- [CMIP6 Persistent Identifiers Implementation Plan](#)<sup>42</sup>: a system of identifying and citing datasets used in studies, at a fine grain. Authorship: Tobias Weigel, Michael Lautenschlager, Martin Juckes and the WIP.
- [CMIP6 Replication and Versioning](#)<sup>43</sup>: a system for ensuring reliable and verifiable replication; tracking of dataset versions, retractions and errata. Authors: Stephan Kindermann, Sebastien Denvil and the WIP.
- [CMIP6 Quality Assurance](#)<sup>44</sup>: systems for ensuring data compliance with rules and conventions listed above. Authorship: Frank Toussaint, Martina Stockhouse, Michael Lautenschlager and the WIP.
- [CMIP6 Data Citation and Long Term Archival](#)<sup>45</sup>: a system for generating Document Object Identifies (DOIs) to ensure long-term data curation. Authorship: Martina Stockhouse, Frank Toussaint, Michael Lautenschlager, Bryan Lawrence and the WIP.
- [CMIP6 Licensing and Access Control](#)<sup>46</sup>: terms of use and licenses to use data. Authorship: Bryan Lawrence and the WIP.
- [CMIP6 ESGF Publication Requirements](#)<sup>47</sup>: linking WIP specifications to the ESGF software stack, conventions that software developers can build against. Authorship: Martin Juckes and the WIP.
- [Errata System for CMIP6](#)<sup>48</sup>: a system for tracking and discovery of reported errata in the CMIP6 system. Authorship: Guillaume Levavasseur, Sébastien Denvil, Atef Ben Nasser, and the WIP.
- [ESDOC Documentation](#)<sup>49</sup>: An overview of the process for providing structured documentation of the models, experiments and simulations that produce the CMIP6 output datasets, by the ES-DOC Team.

---

<sup>40</sup><https://goo.gl/4A1Xtq>, retrieved July 26, 2018.

<sup>41</sup><https://goo.gl/mSe4rf>, retrieved July 26, 2018.

<sup>42</sup><https://goo.gl/miUREw>, retrieved July 26, 2018.

<sup>43</sup><https://goo.gl/Bs4Qou>, retrieved July 26, 2018.

<sup>44</sup><https://goo.gl/eEr8bS>, retrieved July 26, 2018.

<sup>45</sup><https://goo.gl/BFn9Hq>, retrieved July 26, 2018.

<sup>46</sup><https://goo.gl/7vHsPU>, retrieved July 26, 2018.

<sup>47</sup><https://goo.gl/jWfrWb>, retrieved July 26, 2018.

<sup>48</sup><https://goo.gl/fvVTVo>, retrieved July 26, 2018.

<sup>49</sup><https://goo.gl/S3vVxE>, retrieved July 26, 2018.

## Appendix B: Data and code availability

- The software and data used for the study of data compression are available at <https://goo.gl/qkdDnn>, courtesy Garrett Wright.
- The software and data used for the prediction of data volumes are available at <https://goo.gl/Ezz5v3>, courtesy Nalanda Sharadjaya. Much of this functionality has now been absorbed into DREQ itself.

Most of the software referenced here for which the WIP is providing design guidelines and requirements, but not implementation, including the ESGF, ESDOC, DREQ software stacks are open source and freely available. They are autonomous projects and therefore not listed here.

*Acknowledgements.* We thank Michel Rixen, Stephen Griffies, and John Krasting for their close reading and comments on early drafts of this manuscript. Colleen McHugh aided with the analysis of data volumes.

The research leading to these results has received funding from the European Union Seventh Framework program under the IS-ENES2 project (grant agreement No. 312979).

V. Balaji is supported by the Cooperative Institute for Climate Science, Princeton University, Award NA08OAR4320752 from the National Oceanic and Atmospheric Administration, U.S. Department of Commerce. The statements, findings, conclusions, and recommendations are those of the authors and do not necessarily reflect the views of Princeton University, the National Oceanic and Atmospheric Administration, or the U.S. Department of Commerce.

B.N. Lawrence acknowledges additional support from the UK Natural Environment Research Council.

K.E. Taylor and P.J. Durack are supported by the Regional and Global Model Analysis Program of the United States Department of Energy's Office of Science, and their work was performed under the auspices of Lawrence Livermore National Laboratory's Contract DE-AC52-07NA27344.

## References

- Aad, G., Butterworth, J., Thion, J., Bratzler, U., Ratoff, P., Nickerson, R., Seixas, J., Grabowska-Bold, I., Meisel, F., Lokwitz, S., et al.: The ATLAS experiment at the CERN large hadron collider, *Jinst*, 3, S08 003, 2008.
- Andrews, T., Gregory, J. M., Webb, M. J., and Taylor, K. E.: Forcing, feedbacks and climate sensitivity in CMIP5 coupled atmosphere-ocean climate models, *Geophysical Research Letters*, 39, doi:[10.1029/2012GL051607](https://doi.org/10.1029/2012GL051607), <https://agupubs.onlinelibrary.wiley.com/doi/abs/10.1029/2012GL051607>, 2012.
- Baker, A. H., Hammerling, D. M., Mickelson, S. A., Xu, H., Stolpe, M. B., Naveau, P., Sanderson, B., Ebert-Uphoff, I., Samarasinghe, S., Simone, F. D., et al.: Evaluating lossy data compression on climate simulation data within a large ensemble, *Geoscientific Model Development*, 9, 4381–4403, 2016.
- 10 Balaji, V., Ansari, S., and Radhakrishnan, A.: Deploying user-developed scientific analyses on federated data archives, in: *AGU Fall Meeting Abstracts*, vol. 1, p. 01, 2011.
- Balaji, V., Maisonnave, E., Zadeh, N., Lawrence, B. N., Biercamp, J., Fladrich, U., Aloisio, G., Benson, R., Caubel, A., Durachta, J., Foujols, M.-A., Lister, G., Mocavero, S., Underwood, S., and Wright, G.: CPMIP: measurements of real computational performance of Earth system models in CMIP6, *Geoscientific Model Development*, 10, 19–34, doi:[10.5194/gmd-10-19-2017](https://doi.org/10.5194/gmd-10-19-2017), <http://www.geosci-model-dev.net/10/19/2017/>, 2017.
- 15 Bony, S., Stevens, B., Held, I. H., Mitchell, J. F., Dufresne, J.-L., Emanuel, K. A., Friedlingstein, P., Griffies, S., and Senior, C.: Carbon dioxide and climate: perspectives on a scientific assessment, in: *Climate Science for Serving Society*, pp. 391–413, Springer, 2013.
- Chard, K., Pruyne, J., Blaiszik, B., Ananthakrishnan, R., Tuecke, S., and Foster, I.: Globus data publication as a service: Lowering barriers to reproducible science, in: *e-Science (e-Science)*, 2015 IEEE 11th International Conference on, pp. 401–410, IEEE, 2015.
- 20 Charney, J. G., Arakawa, A., Baker, D. J., Bolin, B., Dickinson, R. E., Goody, R. M., Leith, C. E., Stommel, H. M., and Wunsch, C. I.: *Carbon dioxide and climate: a scientific assessment*, 1979.
- Collins, F. S. and Tabak, L. A.: NIH plans to enhance reproducibility, *Nature*, 505, 612, 2014.
- David, C. H., Gil, Y., Duffy, C. J., Peckham, S. D., and Venayagamoorthy, S. K.: An introduction to the special issue on Geoscience Papers of the Future, *Earth and Space Science*, 3, 441–444, doi:[10.1002/2016EA000201](https://doi.org/10.1002/2016EA000201), <http://dx.doi.org/10.1002/2016EA000201>, 2016EA000201, 2016.
- 25 Duffy, D., Maxwell, T., Doutriaux, C., Williams, D., Chaudhary, A., and Ames, S.: Integration and Exposure of Large Scale Computational Resources Across the Earth System Grid Federation (ESGF), in: *AGU Fall Meeting Abstracts*, 2015.
- Durack, P. J., Taylor, K. E., Eyring, V., Ames, S. K., Hoang, T., Nadeau, D., Doutriaux, C., Stockhause, M., and Gleckler, P. J.: Toward Standardized Data Sets for Climate Model Experimentation, *Eos*, 99, <https://doi.org/10.1029/2018EO101751>, 2018.
- 30 Edwards, P.: *A vast machine: computer models, climate data, and the politics of global warming*, The MIT Press, <https://goo.gl/rMHdZk>, 2010.
- Eyring, V., Bony, S., Meehl, G. A., Senior, C. A., Stevens, B., Stouffer, R. J., and Taylor, K. E.: Overview of the Coupled Model Intercomparison Project Phase 6 (CMIP6) experimental design and organization, *Geoscientific Model Development*, 9, 1937–1958, 2016a.
- Eyring, V., Gleckler, P. J., Heinze, C., Stouffer, R. J., Taylor, K. E., Balaji, V., Guilyardi, E., Joussaume, S., Kindermann, S., Lawrence, B. N., Meehl, G. A., Righi, M., and Williams, D. N.: Towards improved and more routine Earth system model evaluation in CMIP, *Earth System Dynamics*, 7, 813–830, doi:[10.5194/esd-7-813-2016](https://doi.org/10.5194/esd-7-813-2016), <http://www.earth-syst-dynam.net/7/813/2016/>, 2016b.
- 35

- Ferraro, R., Waliser, D. E., Gleckler, P., Taylor, K. E., and Eyring, V.: Evolving Obs4MIPs to Support Phase 6 of the Coupled Model Intercomparison Project (CMIP6), *Bull. Amer. Met. Soc.*, 96, ES131–ES133, 2015.
- Gates, W. L.: AMIP: The Atmospheric Model Intercomparison Project, *Bulletin of the American Meteorological Society*, 73, 1962–1970, 1992.
- 5 Gleckler, P., Doutriaux, C., Durack, P., Taylor, K., Zhang, Y., Williams, D., Mason, E., and Servonnat, J.: A more powerful reality test for climate models, *Eos Trans. AGU*, 97, 2016.
- Griffies, S. M., Adcroft, A. J., Balaji, V., Danabasoglu, G., Durack, P. J., Gleckler, P. J., Gregory, J. M., Krasting, J. P., McDougall, T. J., Stouffer, R. J., et al.: Sampling the Physical Ocean in CMIP6 Simulations, *CLIVAR Report*, 2014.
- Griffies, S. M., Danabasoglu, G., Durack, P. J., Adcroft, A. J., Balaji, V., Böning, C. W., Chassignet, E. P., Curchitser, E., Deshayes, J.,  
 10 Drange, H., et al.: OMIP contribution to CMIP6: experimental and diagnostic protocol for the physical component of the Ocean Model Intercomparison Project, *Geoscientific Model Development*, 9, 3231–3296, 2016.
- Guilyardi, E., Balaji, V., Lawrence, B., Callaghan, S., DeLuca, C., Denvil, S., Lautenschlager, M., Morgan, M., Murphy, S., and Taylor, K. E.: Documenting Climate Models and Their Simulations, *Bull. Amer. Met. Soc.*, 94, 623–627, <http://journals.ametsoc.org/doi/pdf/10.1175/BAMS-D-11-00035.1>, 2013.
- 15 Haarsma, R. J., Roberts, M. J., Vidale, P. L., Senior, C. A., Bellucci, A., Bao, Q., Chang, P., Corti, S., Fučkar, N. S., Guemas, V., et al.: High Resolution Model Intercomparison Project (HighResMIP v1. 0) for CMIP6, *Geoscientific Model Development*, 9, 4185–4208, 2016.
- Hoskins, B.: The potential for skill across the range of the seamless weather-climate prediction problem: a stimulus for our science, *Quarterly Journal of the Royal Meteorological Society*, 139, 573–584, 2013.
- Houghton, J. T., Callander, B. A., and Varney, S. K.: *Climate change 1992*, Cambridge University Press, 1992.
- 20 Jukes, M., Eyring, V., Taylor, K., Balaji, V., and Stouffer, R.: The CMIP6 Data Request: the next generation climate archive, in: *EGU General Assembly Conference Abstracts*, vol. 17, p. 13112, 2015.
- Knutti, R.: The end of model democracy?, *Climatic change*, 102, 395–404, 2010.
- Knutti, R., Sedláček, J., Sanderson, B. M., Lorenz, R., Fischer, E. M., and Eyring, V.: A climate model projection weighting scheme accounting for performance and interdependence, *Geophysical Research Letters*, 44, 1909–1918, 2017.
- 25 Lake, I., Gutowski, W., Giorgi, F., and Lee, B.: CORDEX: Climate Research and Information for Regions, *Bulletin of the American Meteorological Society*, 98, ES189–ES192, 2017.
- Lawrence, B. N., Balaji, V., Bentley, P., Callaghan, S., DeLuca, C., Denvil, S., Devine, G., Elkington, M., Ford, R. W., Guilyardi, E., Lautenschlager, M., Morgan, M., Moine, M.-P., Murphy, S., Pascoe, C., Ramthun, H., Slavin, P., Steenman-Clark, L., Toussaint, F., Treshansky, A., and Valcke, S.: Describing Earth system simulations with the Metafor CIM, *Geoscientific Model Development*, 5, 1493–  
 30 1500, <https://www.geosci-model-dev.net/5/1493/2012/>, 2012.
- Lawrence, B. N., Bennett, V. L., Churchill, J., Jukes, M., Kershaw, P., Pascoe, S., Pepler, S., Pritchard, M., and Stephens, A.: Storing and manipulating environmental big data with JASMIN, in: *Big Data, 2013 IEEE International Conference on*, pp. 68–75, IEEE, 2013.
- Moss, R. H., Edmonds, J. A., Hibbard, K. A., Manning, M. R., Rose, S. K., Van Vuuren, D. P., Carter, T. R., Emori, S., Kainuma, M., Kram, T., et al.: The next generation of scenarios for climate change research and assessment, *Nature*, 463, 747–756, 2010.
- 35 NASEM: A National Strategy for Advancing Climate Modeling, The National Academies Press, Washington, DC, doi:[10.17226/13430](https://doi.org/10.17226/13430), <https://www.nap.edu/catalog/13430/a-national-strategy-for-advancing-climate-modeling>, 2012.
- Overpeck, J., Meehl, G., Bony, S., and Easterling, D.: Climate data challenges in the 21st century, *Science*, 331, 700, <http://science.sciencemag.org/content/331/6018/700>, 2011.



- Peng, R. D.: Reproducible Research in Computational Science, *Science*, 334, 1226–1227, doi:[10.1126/science.1213847](https://doi.org/10.1126/science.1213847), 2011.
- Schnase, J. L., Duffy, D. Q., Tamkin, G. S., Nadeau, D., Thompson, J. H., Grieg, C. M., McInerney, M. A., and Webster, W. P.: MERRA analytic services: Meeting the big data challenges of climate science through cloud-enabled climate analytics-as-a-service, *Computers, Environment and Urban Systems*, 61, 198–211, 2017.
- 5 Stocker, T., Qin, D., Plattner, G., Tignor, M., Allen, S., Boschung, J., Nauels, A., Xia, Y., Bex, B., and Midgley, B.: IPCC, 2013: climate change 2013: the physical science basis. Contribution of working group I to the fifth assessment report of the intergovernmental panel on climate change, Cambridge University Press, 2013.
- Stockhause, M. and Lautenschlager, M.: CMIP6 Data Citation of Evolving Data, *Data Science Journal*, 16, 2017.
- Teixeira, J., Waliser, D., Ferraro, R., Gleckler, P., Lee, T., and Potter, G.: Satellite observations for CMIP5: The genesis of Obs4MIPs, *Bulletin*  
10 of the American Meteorological Society, 95, 1329–1334, 2014.
- Williams, D. N., Taylor, K. E., Cinquini, L., Evans, B., Kawamiya, M., Lautenschlager, M., Lawrence, B., Middleton, D., and Contributors, E.: The Earth System Grid Federation: Software framework supporting CMIP5 data analysis and dissemination, *CLIVAR Exchanges*, 56, 40–42, 2011.
- Williams, D. N., Balaji, V., Cinquini, L., Denvil, S., Duffy, D., Evans, B., Ferraro, R., Hansen, R., Lautenschlager, M., and Trenham, C.: A  
15 Global Repository for Planet-Sized Experiments and Observations, *Bulletin of the American Meteorological Society*, doi:[10.1175/BAMS-D-15-00132.1](https://doi.org/10.1175/BAMS-D-15-00132.1), 2015.
- Zhou, G., Weigel, T., and Plale, B.: Persistent Identifier Kernel Information for Machine Discovery, in: *Joint Conference on Digital Libraries*, 2018.
- Ziv, J. and Lempel, A.: A universal algorithm for sequential data compression, *IEEE Transactions on information theory*, 23, 337–343, 1977.

## **gmd-2018-52-SC1**

Interactive comment on “Requirements for a global data infrastructure in support of CMIP6” by Venkatramani Balaji et al. R. Abernathey rpa@ldeo.columbia.edu Received and published: 4 April 2018

Authors: Ryan Abernathey, Naomi Henderson (Lamont Doherty Earth Observatory of Columbia University), Niall H Robinson, Jacob Tomlinson (Informatics Lab, Met Office, Exeter), Kevin Paul, Joseph Hamman (National Center for Atmospheric Research), Jiawei Zhuang (School of Engineering and Applied Sciences, Harvard University), Daniel Rothenberg (ClimaCell, Boston, MA), Matthew Rocklin (Anaconda Inc)...all on behalf of the Pangeo Project (<https://pangeo-data.github.io/>)

SC1-1 We commend the WIP for the rigorous and thoughtful assessment of the global data infrastructure needed to support CMIP6 and beyond. This paper identifies many important challenges related to CMIP data replication, provenance, and scientific reproducibility. Absent, however, is a discussion of the computational challenges associated with the analysis of CMIP datasets and the relationship between data archives and computing resources. Our overall recommendation for revising the paper is to give more attention to this important question. The authors of this comment believe that enabling efficient, accessible, scalable computation on CMIP data should inform the design of the global infrastructure. Instead of encouraging users to download the data to their local systems, we should be encouraging users to bring their computing to the data. This can be achieved by working more closely with national computing centers and by placing CMIP data in cloud storage, where it is directly accessible to distributed computing. As recognized in the manuscript, many of the most valuable science results from the CMIP project come from global comparisons across many models, scenarios, and ensemble members. To obtain these results, scientists must run analysis on significant fractions of the multi-petabyte CMIP archives. As anyone who performs such calculations knows, they rarely work on the first try—interactive exploration and visualization of the data is a crucial part of the scientific process. However, the computing systems deployed for the analysis of CMIP data generally fall far short of producing interactive speeds; instead researchers wait for weeks to test new ideas (we know this from personal experience). Most of these computing systems are what the manuscript calls “dark repositories,” mirrors of CMIP data on servers and computing clusters owned and managed by individual research groups. In addition to disrupting the chain of tracking, provenance, and curation (as discussed in the manuscript), dark repositories are potentially financially wasteful, since the data is transmitted and duplicated over and over just for the purpose of exposing it to computation. Scientists must make an up-front judgement on which fractions they wish to mirror; they may not even use everything they download. In addition, such a priori decisions create an insidious pressure to look for “things you expect to see, in places you expect to see them.” These dark repositories are ultimately funded by agencies such as the US National Science Foundation and its international counterparts, via equipment purchases and technical support staff salaries. No one really knows how many dark repositories there are and how much they cost in aggregate. Despite the prevalence of dark repositories, users are probably frustrated with their performance on terabyte-scale, let alone petabyte-scale calculations. A key technical consideration is that, on standard servers and workstations, most CMIP-style data analysis is heavily I/O bound rather than compute bound i.e. it is limited strongly by the rate at which data can be read from storage. Fortunately, more scalable ways for climate scientists to interact with large datasets are starting to emerge. Intelligent subsetting and lazy loading can

circumvent the need for bulk downloads. Furthermore, when such datasets are placed on distributed storage attached directly to distributed computing, the time-to-result for a given analysis can be reduced by orders of magnitude, ultimately resulting in faster scientific progress. NCAR's CMIP analysis platform is a good example, with CMIP data stored on GLADE (Globally Accessible Data Environment), a high performance parallel filesystem accessible from the compute nodes of the Cheyenne supercomputer. Users with access to this platform are much less likely to want to create their own dark repositories, since they enjoy the combination of high performance computation and comprehensive data access. Although storage on GLADE is expensive compared to a single dark repository, it's probably cheaper than ten dark repositories in aggregate.

While traditional supercomputers can meet some of the data-analysis needs of CMIP users, they were not designed for this purpose and are probably overkill for it. We believe that an ideal data analytics system for these problems has the following properties:

1. Low administrative hurdles to sign up and log in, even for new, junior, or industry users
2. Easy web access for popular interactive environments like Jupyter notebooks
3. Easy web access on the open internet for automated web services and mobile apps
4. Dynamic and immediate allocation of interactive compute resources at modest sizes (hundreds rather than millions of cores) even if those sessions may have to grow or shrink during the allocation, depending on external use
5. Cheap costs, sacrificing the high performance network and rich CPU/Memory ratio of super-computing centers, and replacing them with commodity networking and locally attached storage
6. Co-location with the relevant datasets

Data analytics clusters are growing within existing computing facilities today that have some (but rarely all) of the properties above. Cloud computing, however, is ideally suited to the storage, processing, and distribution of extremely large, shared datasets today. Both, government-sponsored cloud-style data centers, and the commercial cloud (e.g. Amazon Web Services, Google Cloud Platform, Microsoft Azure, etc.) merit consideration. Data stored in cloud storage is directly accessible from cloud computing instances within the same network, providing effectively infinite data bandwidth to distributed processing systems. In this paradigm, no data needs to be downloaded at all; if the CMIP data were already in cloud storage, users would pay only for the compute time they need to do their analysis. The cost of hosting 2PB of data on any of the commercial cloud providers is roughly \$500K USD per year (<https://cloud.google.com/products/calculator/id=8ee0d849-a19b-44ab-b5461b0c0dbe775d>). This is no small sum, but it is likely much less than the collective operating budget of the ESGF nodes. The overall financial cost to funding agencies might even turn out to be less if individual research groups were persuaded to abandon their dark replicas and associated local data storage and computation costs in favor of cloud computing. Furthermore, commercial cloud providers might also provide hosting for free, as they already do for many other scientific datasets (e.g. <https://aws.amazon.com/public-datasets/>, <https://cloud.google.com/public-datasets/>), if they think it will bring them

customers from academia and industry. Beyond academic research, CMIP data hold strong commercial value in sectors such as insurance and energy. If CMIP datasets can be liberated from closed institutional infrastructure, such consumers can more easily combine them with co-located domain specific datasets to gain insights and derive economic benefits. NOAA (an agency already contributing model development and simulation resources to CMIP) has recently adopted such an approach to power their Big Data Project through Cooperative Research and Development Agreements and could provide an example for future development within the climate science community. The scientific payoff from co-locating CMIP data with distributed computing resources would be immense, both accelerating reproducibility and driving innovation in data analysis methodologies—including new machine learning and artificial intelligence techniques. But leveraging full advantage of distributed systems for analyzing climate data requires more than raw hardware; it also requires software which allows climate scientists to parallelize their calculations in a simple, efficient and transparent way, permitting them to focus on science rather than the details of the underlying computing system. A central focus of the Pangeo project is to develop these tools on distributed computing systems and deploy them on high-impact geoscience problems. The building blocks for such software exist, for example, in the scientific Python community in the form of packages such as xarray (<https://xarray.pydata.org>), Iris (<http://scitools.org.uk/iris/>), Dask (<https://dask.pydata.org>), and Jupyter (<https://jupyter.org/>), but require engagement from the broader climate science community to reach their full potential for our field. We stand ready to work with WCRP and ESGF to help our community transition to a cloud-based future.

This is an excellent analysis of the issues involved with the transition to the cloud. We have added a brief discussion of the *current* status of such efforts, see page 7, line 21.. We believe that while exciting, these efforts are not yet mature enough to warrant being mentioned as infrastructural requirements. Indeed, it is a shortcoming of our field that “bringing analysis to the data” has been long promised and not yet delivered (witness the history of earlier projects such as the G8-funded ExArch project). Many of use share Pangeo’s vision and look forward to seeing their efforts come to fruition.

We agree also about the point about wasteful duplication of data, and the potential for cloud storage and computing to alleviate this problem. However, by the “embracing the dark repository” approach, we hope (as shown in Figure 2) to chart a path forward where user communities, at large institutions or consortia around particular scientific interests, can build their own shared repositories, which can be thought of as private clouds. The most wasteful use is for individual scientists in neighboring offices to download the same data onto their separate private stores.

## **gmd-2018-52-RC1**

Interactive comment on “Requirements for a global data infrastructure in support of CMIP6” by Venkatramani Balaji et al.

Anonymous Referee #1 Received and published: 23 April 2018

### Overview

- 5 RC1-Overview-1 This paper reviews the infrastructure requirements needed to make CMIP6 successful. There are some attempts at charting a path towards the future. Overall, in spite of my numerous specific comments below, the paper is well presented with a few notable exceptions. My biggest complaint is that after reading the paper, I am not sure who the target audience is for this paper. This makes my job as a reviewer much harder, since I am guessing at the answer to that question. I have assumed that the audience are those who want to know something about how the networking/software part of CMIP works. This includes some of the modelers and folks in the large climate modeling institutions and a subset of the more comp-sci oriented users of the CMIP data. If other audiences are in view then my review would be very different. This paper is fairly technical. My second big picture issue is that references are needed in many, many places to either point the reader to supporting documentation or to find web sites that explain in more detail what the functions are of the various groups/position papers mentioned in the paper. Finally, references are also needed to support the statements made in the paper. My specific comments below highlights many of the missing references.

[We thank the reviewer for a thorough and knowledgeable reading of the paper. In the revised text, we have addressed explicitly the question of intended audience, see page 4, line 14. Re the point about references, see below the answer to RC1-15. Several additional citations have been added as well.](#)

- 20 RC1-Overview-2 Lastly, Section 3.4 needs rewritten. It is very confusing. There are lots of recommendations. In places, the language reads like these are a requirement. In other places, the prose basically say that the recommendations can be ignored. There needs to be some priority applied to the discussion. The readers need to know at the beginning of the section what is coming – requirements, recommendations, best practices or what. Each item discussed needs to be clearly defined in one of the bins – requirements, recommendations, etc. Some parts may be able to be deleted.

[The distinction between findings, requirements, and recommendations is made clear now in the introduction, see page 4, line 9.. The section has been considerably edited in response to this comment, and comments below, RC1-20–24.](#)

### Specific Comments

- 30 RC1-1 1. Page 1, line 11 – purpose of assigning credit – This seems awkward/backwards to me. The tracking is so that the credit is clearly assigned, not the reverse.

[Agreed, awkward wording removed, see page 1, line 11.](#)

- RC1-2 2. Page 2, line 6-8 – A references is needed for this statement.  
Agreed, added, see page 2, line 7.
- RC1-3 3. Page 2, line 11 – capable – Wrong word. “Available” is a better word. There were other climate models available around in the world at that time.  
5 Agreed, see page 2, line 12.
- RC1-4 4. Page 2, line 15 – Add “group” after Manabe.  
Agreed, see page 2, line 16.
- RC1-5 5. Page 2, line 16 – Add “group” after Hansen.  
Agreed, see page 2, line 17.
- 10 RC1-6 6. Page 2 Line 17 – 24 – The role of AMIP is missing here in the formation of CMIP. I agree that the IPCC also played a role, but Larry Gates and AMIP was a necessary step to have CMIP formed.  
Agreed, reference added, see page 2, line 19.
- RC1-7 7. Page 2, line 23 – I believe there are now 23 MIPs.  
15 Agreed. We note 2 new MIPs have been added since the first draft of this paper, as well as the canonical citation for CMIP6, Eyring et al. (2016a), which is used in the text. The new wording reflects this evolution, see page 2, line 27.
- RC1-8 8. Page 3, line 10-17 – References for CMIP3 and 5 are missing.  
We believe this is covered by earlier references to Eyring et al. (2016a).
- RC1-9 9. Page 5, line 4 – Reference needed for IPCC.  
Added at first reference to IPCC, see page 2, line 20.
- 20 RC1-10 10. Page 7, line 2 – consumers – Is “society” a better word choice here?  
We believe “value to society” of individual datasets is hard to assess, but value to actual data users/consumers – for example by citation counts – is a measurable quantity.
- RC1-11 11. Page 7, line 8 – Designing – I think the CMIP Panel understands the cost of participating in CMIP since it is mainly made up of modelers. It could be argued that some of the new MIP chairs in CMIP6 do not understand. Certainly, most users do not understand. Rerword.  
25 Rerworded, see page 8, line 3.
- RC1-12 12. Page 7, line 9 – Add “data archived in” before CMIP experiments.  
Rerworded, see page 8, line 4.

- RC1-13 13. Page 7, lines 7-10 – This section is vague. Expand and define exactly what is in view here. I assume it includes model development, cpu and storage costs, people time and etc. What is in view? Exactly what costs are in view?  
Some explanatory text added, see page 8, line 8.
- RC1-14 14. Page 7, line 19 – machine readable experiment design – This needs to be explained here. Page 8, line 14 has a similar problem. It needs noted that this is a goal of this effort.  
Some explanatory text added, see page 8, line 18.
- RC1-15 15. Page 7, line 29 – A reference and location is needed for the fact sheet.  
In the first draft we used embedded URLs, which were not visible by editorial decision on coloured text. All URLs have now been made visible as footnotes, including this one, see page 8, line 30.
- RC1-16 16. Page 8, line 5 – Where are these position papers found??? Are they peer reviewed, citations?  
As noted, these are listed in Appendix A as noted. The citations are there, but as above the embedded URLs were invisible. They are now visible in footnotes. The position papers are not themselves peer-reviewed, though publicly available for comment: this paper is in fact their peer review.
- RC1-17 17. Page 8, line 13 – machine readable – This needs defined. Anything stored in a computer is machine readable. . .by definition. More is needed.  
It is explained just below, as being encoded in structured text documents in XML or JSON format for example.
- RC1-18 18. Page 10, line 19 – smaller – I think “larger” is correct. . .nearer to 1. The exponent is larger.  
Explanatory text added clarifying why it is in fact smaller, not larger, see page 11, line 22.
- RC1-19 19. Page 10, line 24 – Add “the first part of complexity” somewhere near here. The second paragraph starts with the “second component of complex” which is confusing given the prose in the first paragraph.  
Fixed, see page 11, line 29.
- RC1-20 20. Page 11, line 3 – WIP has recommended – This seems in conflict with line 11 and page 12, line 32. As I note in my general comments section, this section is not well written or thought out. What message do the authors want to convey to the readers? Rewrite.  
We have considerably rewritten Section 3.4 for clarity, following this reviewer’s and others’ recommendation.
- RC1-21 21. Page 11, lines 4-24 – Regridding – I understand the Griffies papers have a long discussion of the advantages and disadvantages of regridding, but a summary of those papers need to be presented here. The whole discussion of the disadvantages of regridding is missing here.  
Discussion added, see page 12, line 20..

RC1-22 22. Page 11, lines 4-24 – Common grid – So what are the authors recommendations for a common grid or regridding? If there are none, then delete this discussion to just a summary of the Griffies papers.

The distinction between findings, requirements, and recommendations was made explicit in the introduction, see page 4, line 9.. Furthermore, we have made explicit that where there is no consensus, we can but present arguments for and against, as this reviewer has requested. We have duly represented here the debate around regridding, calendars, and data deflation, and noted the lack of consensus. The debate needs to continue, in the literature and in other forums of experimental design, until a compromise is achieved. We have also described, in Section 5.2, a tracking mechanism to provide data for this debate, in terms of what user preferences are with respect to these issues.

RC1-23 23. Page 11, lines 32-33 – Again, what is the recommendation? If none, what is the justification for keeping the text?

See above.

RC1-24 24. Page 12, lines 4-10 – What is the recommendation? If any, it needs highlighted. Has the WIP surveyed CMIP users in regard to these recommendations? I am worried that many users will not be able to handle compressed files or shuffled data files.

See answer above. There has been no explicit survey of users in this regard. Shuffling and re-inflation are automatic and transparent to the user if using netCDF4 libraries.

RC1-25 25. Page 12, line 8 – coupled model – Define. There are many types coupled models in climate. I assume AOGCM and ESMs are in view.

Fixed, see page 13, line 29.

RC1-26 26. Page 12, line 15 – I do not see what the advantages are of a modeling center having this tool. Please explain. The center should know its model's grid and variables to be archived. . . .

Explanatory text added, see page 14, line 15.

RC1-27 27. Page 12, line 18 – Add “compressed” before “data volume”.

see page 14, line 8.

RC1-28 28. Page 12, line 20 – Add “current CMIP 3 and 5” before archive size.

see page 14, line 8.

RC1-29 29. Page 12, line 21 – 25 – The sentences that start with “The more dramatic . . .” And end with “in years simulated” seems out of place and should be moved much earlier.

Agreed, some lines have been a few paragraphs above, see page 12, line 2. and see page 14, line 10..



RC1-30 30. Page 12, lines 26-27 – an attempt to impose rational order on CMIP5, rather than a qualitative leap” – What is the unit of measure here? Be careful to fully explain this phrase. As is it could easily be misused or misunderstood. If CMIP6 is just imposing order, why the large expenditure of resources?

The sentence states that CMIP6’s structural innovation (DECK+endorsed MIPs) imposes order, not CMIP6 itself. We believe this sentence should be allowed to stand.

RC1-31 31. Page 12, line 32 – merely recommendations – As noted in my general comments, this paper needs to be much clearer what is meant by “recommendation”.

RC1-32 32. Page 13, fig. 2 caption – data usage pattern – It seems to show data access, not usage.

Agreed, caption fixed.

RC1-33 33. Page 13, line 4 – Add “third party” in front of “copies”. Also delete rest of sentence after “copies”. It is not clear what is meant and seems redundant with first half of sentence.

We have added “third party” as suggested, but believe that the reference to the snapshots should be allowed to stand, as they were a notable community contribution to CMIP5.

RC1-34 34. Page 13, line 16 – More is needed here. How will a modeling center know when somebody is misusing its data? Is their any software existing or planned to help a center track its data? If so, it needs mentioned here. Furthermore, how can the license change in time in this scheme? Many centers make their data public after a period of time. It seems that the data files will need to be rewritten to change the license agreement. Is this the plan?

It is not possible to know when someone is using, let alone misusing, data, until someone notices and informs the data provider. We assume here the reviewer means by “misuse”, a contravention of the license terms. If “misuse” is intended to mean mis-interpretation, we rely on the journal peer review process to prevent that.

Even if such tracking technologies were available, they would be quite intrusive, and quite surely involve privacy violations. However, when data is properly cited following the findings outlined in Section 5, data providers will be able to assess the utility of their data. We believe this will be a substantial advance over current practice.

As regards a center changing the terms of their license after the data has been published, that will require the issuance of a fresh PID. The terms of use require the user to adhere to the license associated with the PID used.

RC1-35 35. Page 14, line 1 – Reference needed (location) of the . . .4.0 International License.

References visible now, see answer to RC1-15.

RC1-36 36. Page 14, line 13 – Consortium – Reference, web site?

References visible now, see answer to RC1-15.

- RC1-37 37. Page 14, line 28 – Handle System – Reference.  
Reference added, see page 16, line 23.
- RC1-38 38. Page 15, line 4 – position paper – Where is this found?  
References visible now, see answer to RC1-15.
- 5 RC1-39 39. Page 15, line 11 – DataCite infrastructure – Reference and location.  
References visible now, see answer to RC1-15.
- RC1-40 40. Page 15, line 22 – informally peer reviewed – This needs better defined. Unclear what this is.  
Clarified, see page 17, line 21..
- RC1-41 41. Page 15, line 27 – collections are static – How will groups correct errors found after the DOI is set? How will  
10 corrected data be made available? How will users know there are corrections?  
We have clarified the treatment of errors, see page 17, line 27.. Users can discover if the data (PIDs) they are using are superseded using the errata service, Section 7.1.
- RC1-42 42. Page 16, figure 3 caption – PID architecture . . . – PID is not found in the figure. How/What things in figure gets a  
15 PID? The current figure caption should read “A cartoon of data generation. . .”  
Caption to Figure 3 updated.
- RC1-43 43. Page 16, line 5 – global Handle registry – Reference, web site needed.  
Added above, see page 16, line 23.
- RC1-44 44. Page 16, line 9 – CMIP6 Handle service – Reference, web site location needed  
Added above, see page 16, line 23.
- 20 RC1-45 45. Page 16, line 11 – Add “for all simulation times” after “a single experiment”. . . if correct. If not, add details.  
Clarified, see page 18, line 11.
- RC1-46 46. Page 16, line 13 – position paper – Location?  
References visible now, see answer to RC1-15.
- RC1-47 47. Page 17, line 1 – Is there software to generate such a list? Seems like in multimodel studies such a list could be  
25 very long. Will journals publish a long list?  
Indeed, a list of PIDs could be very long. In general, journals (including even leading ones such as *Science*) do not count supplementary material against page count limits or costs, nor do they include them in print versions, so the length should not be an issue.

If the reviewer is asking if the WIP is providing software for this purpose, the answer is no. But as the PIDs are in the netCDF files, it cannot be seen as difficult for scientists to harvest them from the files they use in their research.

Text unchanged.

RC1-48 48. Page 17, line 4 – RabbitMQ – Reference needed.

5       References visible now, see answer to RC1-15.

RC1-49 49. Page 17, line 20 – CMOR – Reference and web site needed.

References visible now, see answer to RC1-15.

RC1-50 50. Page 17, line 21 – PrePARE – Reference and web site needed.

References visible now, see answer to RC1-15.

10 RC1-51 51. Page 18, line 4 – QA nodes – I assume this is software. As written seems like hardware. More is needed.

It is indeed hardware. Text updated, see page 20, line 8..

RC1-52 52. Page 19, line 6 – realms – Define.

see page 22, line 2.

RC1-53 53. Page 19, line 7 – a set of tables – More is needed or delete.

15       Added, see page 22, line 4.

RC1-54 54. Page 19, line 13 – version-controlled code – Add “software that generates versioncontrolled code”. It’s all code. . .

Clarified, see page 22, line 9.

RC1-55 55. Page 20, line 21 – embedding – By whom? Modeler?

Clarified, see page 22, line 33.

20 RC1-56 56. Page 20, line 26 – position paper – Location?

References visible now, see answer to RC1-15.

RC1-57 57. Page 20, Replication section – I did not see any way for 1-off data sets to be issued PIDs. I appreciate that this is hard to enforced but the major impact user distribution sites should be required to issue PIDs in this framework. Numerically, the impact users are the single biggest group using CMIP data. Many of the sites serving them, preprocess the model data – generating new data sets, subsets, averages and so forth. These new data sets should not have model PIDs, but their own.

25

This is an excellent point, and we have added clarifying text, see page 25, line 22.

- RC1-58 58. Page 21, line 4 – This statement implies that there are some CMIP data sets NOT accessible across ESGF. Is this true? More needed here. It is not clear what is meant.  
Clarified, see page 23, line 14.
- RC1-59 59. Page 21, line 11 – ICNWG – Reference, web site needed.  
5       References visible now, see answer to RC1-15.
- RC1-60 60. Page 21, line 13 – synda – Reference, web site needed.  
References visible now, see answer to RC1-15.
- RC1-61 61. Page 22, fig. 7 caption – CMIP6 replication team – It says CDNOT does this on the previous page. Correct.  
Clarified in the caption to Figure 7, also see page 24, line 6..
- 10 RC1-62 62. Page 22, lines 3-6 – Does this break the data chain (PID and etc.)? More needed.  
More explanatory text added, see page 25, line 8.
- RC1-63 63. Page 23, Errata section – Are the replication nodes inside or outside of CMIP? This is not clear.  
It is not clear what text the reviewer is referring to, as there is no reference to replication nodes in the Errata section.  
Nonetheless, as a general comment, we have attempted to move away from the notion of “inside” and “outside” nodes:  
15       for instance, see page 25, line 8.
- RC1-64 64. Page 24, line 25 – our data – Change to “climate” or “CMIP” data.  
Corrected, see page 28, line 10.

## **gmd-2018-52-RC2**

Interactive comment on “Requirements for a global data infrastructure in support of CMIP6” by Venkatramani Balaji et al.  
Anonymous Referee #2 Received and published: 23 April 2018

### General comments

5 RC2-1 The manuscript provides an overview of WRCP’s Infrastructure Panel (WIP) work, discussions and recommendations regarding the evolution of CMIP6’ cyberinfrastructure. It discusses some of the limitations of the current system, projections for future requirements and the rationale for decisions made by the WIP. It also describes some of the systems that are being put in place in preparation for CMIP6, in particular to better support citations, errata and provenance information for datasets and large ensembles, as well as managing the increasing volume of information to be stored. The paper would benefit from an in-depth editorial review. It abuses bullet lists and the level of technical detail varies considerably across sections and topics. The result is that although interesting and pertinent, the manuscript is at times confusing and hard to decipher. I was sometimes left with the impression that the paper was composed by copy-pasting sections of various WIP reports. The big picture (data-centric system) only really became clear to me at the end of a second reading; many of its implications are scattered across and not properly merged and highlighted in the conclusion. Indeed, the conclusion deserves some love, as at the moment it consists in fairly disjointed bullet list items. The figures would also benefit from some attention as they apparently have been created independently from each other, and their content does not always support very well the text around them. Most of my suggestions below concern style, as I understand that the manuscript has to reflect the WIP’s finding and work, which can’t be modified to please reviewers. I think however that the paper should leave some room to discuss criticisms made here and elsewhere and possibly respond to those. Among these would be the relatively small attention given to server-side analytics (raised by another referee). I also wonder why the paper does not discuss user-feedback? Is this the responsibility of the WIP, ESGF or CDNOT? How does the WIP consult users, what do they think of the tools that are built and operated for them? The paper makes no mention of recommendation concerning the user interface of public facing services. Does the priority setting process involves non-IT scientific users? Does the WIP include representatives from institutions operating dark repositories? Clearly they are prime users of CMIP data, yet feel the need to duplicate functionalities, and I somehow doubt it is only a matter of bandwidth optimization. Other topics not addressed by the paper are software security and openaccess, as many of the technical issues that have frustrated users and complicated the life of software developers had to do with access tokens. I feel the paper would be stronger if it discussed the feedback it got from the downstream climate science community and used this paper as an opportunity to communicate with it. I think there is a need for such a communication exercise after the frustrating experience some have had with CMIP5 data access in the past.

The reviewer raises several excellent points, and addressing those has considerably clarified the text. To begin with, we have (hopefully) addressed some of the stylistic issues, such as the “abuse” of bullets, point well taken. Second, we hope the text makes clear that the WIP has indeed taken the temperature of many of the players in this arena

(through in-depth consultations, not mass email): we note in particular that data *users* alone are not the target of this temperature-taking: data providers, managers of repositories (official and dark), and users have all been taken into account, and indeed are represented on the WIP itself. We have restructured the document to provide more context, including historical; and considerably rewritten the conclusions with more “love”, we hope.

5 Also, as the reviewer notes, the findings here can be challenged if they are technically incorrect, but if they reflect the current community consensus (or lack thereof), we can but report that in this article, which we have done. The distinction between findings, requirements, and recommendations is made explicit, see page 4, line 9. We have strictly followed that nomenclature in the subsequent text.

Detailed comments

10 Page | Line | Comment

RC2-2 1 7 "data as a commodity in an ecosystem of user" what does this mean exactly?

Clarified, see page 1, line 7.

RC2-3 1 11 dataset-centric: Shouldn't the objective be for the system to be user-centric?

15 Of course, the intent is always to be “user-centric”. In practice however, we believe we cannot anticipate all possible user needs, as the users of climate data are very diverse, and the science continues to evolve. This is why we have tried to introduce the notion of a data ecosystem, see page 1, line 7..

The distinction we are trying to make here is that there is no giant software infrastructure that is itself a single point of failure. Once users have datasets in their hands, or even their PIDs, they can continue to perform data transactions peer to peer even if, for instance, some key ESGF nodes go down.

20 This point is repeatedly brought up throughout the text, and here in the abstract in the phrase “less prone to systemic failure”. No changes in response to this reviewer comment.

RC2-4 2 9 prescient: maybe a bit strong

see page 2, line 10.

RC2-5 2 15 3 -> three. As a general rule, spell numbers < 10

25 see page 2, line 16.

RC2-6 2 18 5 -> five

see page 2, line 21., see page 2, line 23.

RC2-7 2 18 "formalized" used in last sentence and sentence is unclear. Mix of historical and current (DECK) denominations is confusing.

30 reworded, reference added, see page 2, line 21.

RC2-8 3 6 in in Figure 1

see page 3, line 11.

RC2-9 3 6 (some of) remove parentheses

see page 3, line 10.

5 RC2-10 3 8 Is the ESGF a "component". It looks to me as a loosely structured organization, with a "soft leadership", which indeed poses a number of challenges in terms of planning and delivery of operational software. This is possibly out of scope for this paper, but consider adding a paragraph somewhere in the paper about how ESGF organizes to implement WIP recommendations and some of the challenges it faces.

10 Replaced "component" with "artifact", see page 3, line 13.. We agree that the ESGF response to WIP requirements is out of scope for this paper, and a separate paper on the ESGF itself is warranted, once the software stack is finalized, and the system operational.

RC2-11 3 12 upon , a proposal

see page 4, line 2.

RC2-12 4 Figure 1: There is a site that looks to be in James Bay. Also is it really necessary to include personal contact email?

15 This is something that can get outdated very fast.

A more appropriate figure has been substituted, see Figure 1 and see page 3, line 10.. Here the nodes are mapped to their geographic locations rather than relative to national boundaries.

RC2-13 5 6 It's not clear to what "which are summarized here" make reference to, "fundamental changes" or the "evolving scientific and operational requirements"?

20 The clunky phrasing has been removed in the rewrite of Section 2.2.

RC2-14 5 7 The presentation is a bit awkward here, with a numbered list nesting a bullet list. I feel that this could all be written in text form. Also, the text suggests that the following items are "changes", but some of the opening statements are not.

We thank the reviewer for this useful guidance, and the entire Section 2.2 has been rewritten as suggested, without bullets. Also, re "changes", see page 5, line 26.

25 RC2-15 6 9 review sentence syntax, second clause seems incomplete. Again, the bullet format feels inappropriate for dense and elaborate content.

Entire section rewritten as noted above.

RC2-16 6 21 The first bullet is the context, and the second the requirement. Please maintain some uniformity in the organization of ideas.

30 Bullets removed, see see page 7, line 12.

RC2-17 7 11 Idem

Bullets removed, see see page 8, line 12.

RC2-18 8 15 The data request concept is not properly introduced. Please clarify what it is and what purpose it is intended to serve before providing implementation details.

5 Context provided, see page 9, line 17.

RC2-19 8 16 I feel that the level of details given on Data Requests far exceeds that of other sections. Who are the intended users? Data managers or analysts? Is the level of detail really relevant to this paper? Frankly, I read it a couple of times and I still don't understand the role it plays.

10 We have rewritten Section 3.1 at an appropriate level of detail, and hope, with the added context, its key role is now readily understood.

RC2-20 11 3 If I understand correctly, the single most important factor in the growth of data volume between CMIP3 and 5 is the number of variables that are archived. Yet, this issue does not appear to be formally addressed by the WIP as a volume problem further down in the text. At the moment, my understanding is that data is saved using the 1-file-per-variable approach. With hundreds of variables to probably co-vary in time and space, I'm guessing there might be compression benefits in storing multiple variables in the same file.

15 The data volume discussion has been rewritten, see Section 3.4. As regards the second point, it is no doubt true that many of the variables exhibit considerable covariance, and are not statistically independent. But this remains still a matter for analysis and discovery. The current 1-variable-file remains a useful unit of analysis, a compromise for most users between too large files and too many files. Future infrastructure may indeed move in other directions based on the outcomes of CMIP6, and indeed POSIX "files" may themselves become obsolete, under certain technological evolutionary pathways currently at the cutting edge. We have added some discussion of these issues in the Conclusion.

RC2-21 11 4 The use of a numbered list here makes little sense.

List removed, see page 12, line 13.

25 RC2-22 11 4 Please start the paragraph with the recommendation itself. Same suggestion applies to second recommendation.

Section 3.4 has been considerably rewritten, and the recommendations restated at the end of the section.

RC2-23 11 13 Is the reference to the name of the actual python file really necessary? I suggest putting links to tools and software in appendix B.

We have removed the excess detail in the rewrite of Section 3.4, see page 14, line 1..

30 RC2-24 12 20 CMIP archive size. Are you referring to CMIP5? Please clarify.

see page 14, line 9.



RC2-25 12 21 Sentence is confusing : "same causes, but with a much larger change"

Reworded, see page 14, line 10.

RC2-26 13 Fig 2. Why "!" after local cache ?

Gone, see caption to Figure 2.

5 RC2-27 13 14 Is that really “embracing” the dark repository model? I believe embracing that model would entail something a lot more ambitious such as a P2P network between official and dark repos that lets ESGF leverage dark repo to replicate and disseminate data. This is discussed later with synda (as far as I understand), but would deserve discussion here.

Clarifying text, and connection to replication discussion added, see page 15, line 14.. Replication is peer-to-peer in this system but based on units of atomic datasets, not packets, as in say BitTorrent. This does not preclude future development of P2P replication at the packet level.

10

RC2-28 13 15 Review syntax.

As this is a quote from another document, it doesn't seem appropriate to change the syntax. The meaning seems fairly clear to us. The editors should let us know if they disagree.

RC2-29 13 18 I don't understand what this sentence means and how it relates to the preceding text.

15

Some of this text is indeed out of place, rewritten. see page 15, line 4.. Some of the text is displaced to a discussion of the role of cloud analysis platforms in reducing data movement, see page 7, line 21..

RC2-30 13 20 Idem.

With the changes, we believe there is now continuity in the licensing discussion, see page 15, line 15..

RC2-31 13 26 Please define "handles". Figure 4 Who issues the PID? The data producer? This is only discussed later on page 18. I think it should be explained earlier.

20

Reference for Handles added, see page 16, line 23.. PID issuance introduced here, see page 16, line 24..

RC2-32 20 17 Close parenthesis

see page 22, line 28.

RC2-33 21 5 Item 4 in section 2 only discusses model evaluation, not general data analysis.

25

This section has been generalized as suggested, see page 7, line 21..

RC2-34 Figure 7 It's not clear what this figure adds to the explanation.

While we encourage ad-hoc replication, we wish to also underline the concerted effort to make sure high-value data is not repeatedly moved across geographic domains. This figure illustrates the efforts to coordinate replica nodes with sufficient storage, as well as the involvement of the network provisioners (ICNWG). We believe the figure should stay.

30

RC2-35 24 24 Bullet list with no proper introduction. Please write a proper conclusion.

Section 8 has been rewritten following reviewer's suggestion.

RC2-36 25 8 Is that really the message you want to end with? I suggest ending with an invitation to the climate science community to provide feedback and suggestions, and generally get involved in the WIP's activities.

5 See answer above.

### **gmd-2018-52-RC3**

Interactive comment on “Requirements for a global data infrastructure in support of CMIP6” by Venkatramani Balaji et al.  
Anonymous Referee #3 Received and published: 8 May 2018

5 The paper describes the challenges for the global data infrastructure needed to support the ongoing efforts of the climate  
modelling community that are organised in the CMIP enterprise. The material presented is of great importance and should be  
published. However, its presentation does not meet the requirements of a journal article and requires major revision. There are  
two major issues that need to be addressed as the paper gets rewritten:

RC3-1 1. The paper is clearly the result of a lot of work within the WGCM Infrastructure Panel. Acknowledging this is  
important, but the paper completely goes overboard and as a result reads like a report to some steering committee,  
10 rather than a journal article. I counted no less than 46 (and I am sure I missed some) occurrences of statements like  
“The WIP recommends. . .”, “The WIP did. . .” or “Based on what the WIP thinks . . .”. This is simply not the style of  
a paper. I recommend removing all these references and telling us what the authors of this paper think. I realize they  
are the WIP, but the reader does not need to be told this every other paragraph. I suggest putting a clear statement that  
the suggestions of this paper are the result of deliberations by what is likely a temporary body in the long run, the WIP,  
15 and then present what are hopefully not temporary conclusions for the infrastructure needs. I also suggest avoiding  
repeated statements that more detail can be found in WIP reports. This can be said once and the reports listed in the  
Appendix, as is the case.

We thank the reviewer for their thorough and candid review. This stylistic recommendation has been followed through-  
out in the revision of the text (too many instances to call out here...) and we believe has greatly enhanced its readability.

20

RC3-2 2. Perhaps the more important question I struggled with is who the intended audience for this paper is, which will  
define its purpose and then structure. If it is scientists and users, the paper needs to significantly cut down on jargon  
(see minor comments below). If it is infrastructure communities outside climate, then this should be written as an  
example for what challenges the climate community is facing and what it is doing about it, so that others can learn  
25 from it. Or is it the modelling centres to instruct them on new procedures and tools? In that case, a paper is unlikely  
needed as they can be sent an email with the detailed position papers! At the moment, neither community will benefit  
from this paper as it isn't clear what it is trying to achieve. I realize that this is harder to solve than issue 1, but it is  
important to know this before rewriting the paper begins. Once it is clear, the goal should be stated in the introduction.

This is a good point raised by RC1 as well, and we have provided some context, see page 4, line 14.. The text and  
conclusions have been modified as well to make clear the audience and intent. A new section on Historical Context has  
30 been added, Section 2.1.

More minor but often typical issues in chronological order

- RC3-3 Page 2 Line 17 – The statement that by the FAR of the IPCC modelling inter comparisons were formalised is untrue. The first formal model inter comparison was AMIP and was reported in 1992. (Gates, W. L., 1992: AMIP: The Atmospheric Model Intercomparison Project. Bull. Amer. Meteor. Soc, 1962–1970, doi:10.1175/1520-047773.12.1962.) CMIP started only after that. Please correct this
- 5 [Agreed, reference added, see page 2, line 19..](#)
- RC3-4 Page 2, Line 18 – Please cite the appropriate paper when referring to the DECK
- [Citation added, see page 2, line 21.](#)
- RC3-5 Page 4, Figure 1 – Most dots on this figure are in the city the node is located. The one in Australia is in the middle of the desert. Canberra is not. Please correct.
- 10 [See reply to RC2-12.](#)
- RC3-6 Page 8, Line 17 – What is “The data request”. This needs an introductory sentence as only people in the know will know. Same line: What is the “DREQ” tool. This is an example for the frequent jargon with no explanation. Please be more careful as not every reader will already know these acronyms.
- [Good point, and we have added context, see page 9, line 17.. Some unneeded jargon removed.](#)
- 15 RC3-7 Page 8, Line 28 – The sentence about the database allowing MIPs to do things is another example for jargon. It means nothing to someone who doesn’t already know all this. Please explain it better. For instance, highlight that different MIPs will request different variables, but some will be common. You can’t assume the reader to be a CMIP expert and if you do, why write this paper?
- [Section 3.1 has now been rewritten at what we hope is an appropriate level of detail and context.](#)
- 20 RC3-8 Page 9, lines 1-3 – This list is very confusing and requires more context.
- [Addressed in the revised Section 3.1, bulleted lists removed.](#)
- RC3-9 Page 9, lines 16-20: A single paragraph does not deserve it’s own subsection. Please correct. The last sentence is another example for a sentence from a report that makes little to no sense to an independent reader. Please remove those as you rewrite the paper.
- 25 [While this section is indeed quite short, the input4MIPs and obs4MIPs efforts, and their coherence with the overall data design, is an important element and we believe this point will be lost if it is buried in a paragraph somewhere. This point is highlighted and the language on versioning clarified, see page 10, line 19.](#)
- RC3-10 Page 10, Line 6 – The statement on increasing data volumes overstates the case if its is not put into context. The Large Hadron Collider produces vastly larger data volumes than any set of climate models ever will! It is important to clarify
- 30 that the challenge is that the data is both produced and used in a distributed network. If one place with all the resources

needed ran all the CMIP runs from all the models, archiving them would be simple! Distributing them might still be challenging though!

Context added, see page 11, line 5.

RC3-11 Page 10, lines 28-29 – What do you mean with “appear to have grown”. Has it or not?

5 see page 12, line 8.

RC3-12 Page 11, line 11 – What is the “CMIP6 Output grid guidance document”? If you use it, you need to provide a reference/link to it.

References visible now, see answer to RC1-15.

RC3-13 Page 11, line 16-18 – To an outsider to the climate community this appears insane! There is only one real calendar and it has to do with the Earth going around the sun in a certain unit of time. It would be worth commenting on the future of this, as it implies a “laziness” in the climate community to do something simple (I understand it is not that simple).

10

Good point :-). An explanation of the calendar issue for “outsiders” has been added, see page 13, line 1..

RC3-14 Page 11, line 23-24 – Again, to an outsider this sounds strange. How can infrastructure that does relatively straightforward analysis be overburdened? Isn’t that because the way this is funded is inadequate. If you agree, isn’t important to point this out in this paper about the future?

15

Regridding of data is burdensome for many reasons: we have more explicitly pointed out this out now earlier in this section, see page 12, line 20.. We have added a discussion in the Conclusion section about the funding constraints.

RC3-15 Page 11, line 25 – By now I had now idea that there were two issues. Please remove this first and second bit. The first issue was several already!

20

The numbering has been removed, see page 12, line 13..

RC3-16 Page 12, line 5 – If the results are public, please cite where and how the reader can access them.

References visible now, see answer to RC1-15.

RC3-17 Page 12, line 14 – Where is the WIP website? Please add a link.

References visible now, see answer to RC1-15.

RC3-18 Page 12, line 29-30 – Jargon. We don’t know what a Tier1 node is, let alone that it has a manager. Explain or remove!

25

see page 14, line 22.

RC3-19 Page 14, line 2 – PCMDI website – please cite properly by adding the link.

References visible now, see answer to RC1-15.

RC3-20 Page 14, line 20 –  $O(10^6)$ ,  $10^6$  what? Add units.

It is a dataset count as stated, no units.

RC3-21 Page 20, line 26 – A good example of overdoing the WIP(ping). The reader does not care where the replication strategy is covered. They want to know what there authors of this paper have to say about replication.

5 see page 23, line 5.. In general there is much less WIPping in the new draft, see answer to RC3-1.

RC3-22 Page 21, line 21 – Jargon. What is the CDNOT group? Please explain.

The CDNOT was introduced above, see page 6, line 14..

RC3-23 Page 23, line 21 – There seems to be only one subsection, so why have it? Please remove the heading.

10 The Errata section is related to versioning but an important independent piece, deserving of its own section, in our estimation.

RC3-24 Section 8 – I was disappointed by this section, as I was expecting a summary of the main challenges and recommendations for solutions. I feel some of the challenges need to be spelled out here. For instance, funding for the activities described here is pretty ad-hoc. This is disturbing given the attention the world pays to the data sets in question. Is there something here to discuss? Can the world continue to scramble its way through this? Thoughts? Other big issues: Doing more and more in CMIP (more models, more experiments, more users) cannot be sustained unless investment into the enterprise gets better coordinated – any role for international organisations to help with this? Many of the issues are discussed are the result of accepting the status quo in distributed climate modelling. Should we? Are there more sensible alternatives?

20 Section 8 has been considerably rewritten. In it we have mentioned that prior panels including at the US National Academies level, have indeed made this case, but so far to no avail. We have explained how the new dataset-centric design is indeed intended to reduce systemic risk due to infrastructure failure, and allows for a scalable system that is sized at a level appropriate to available resources.

RC3-25 Appendix A – Might be nice to add links to each of these reports (or the main page where they can all be found).

References visible now, see answer to RC1-15.
